# Supplementary material for: The box C/D snoRNP assembly factor Bcd1 interacts with the histone chaperone Rtt106 and controls its transcription dependent activity
Source: PubMed Central journal article supplement (PMC7994586; doi:10.1038/s41467-021-22077-4), 2021-03-25
Supplement: 41467_2021_22077_MOESM1_ESM.pdf [file 41467_2021_22077_MOESM1_ESM.pdf]

## **The box C/D snoRNP assembly factor Bcd1 interacts with the histone chaperone Rtt106 and controls its transcription dependent activity**

Benoît Bragantini<sup>1</sup>, Christophe Charron<sup>1</sup>, Maxime Bourguet<sup>2</sup>, Arnaud Paul<sup>1</sup>, Decebal Tiotiu<sup>1</sup>, Benjamin Rothé<sup>1</sup>, Héléne Marty<sup>1</sup>, Guillaume Terral<sup>2</sup>, Steve Hessmann<sup>2</sup>, Laurence Decourty<sup>3</sup>, Marie-Eve Chagot<sup>1</sup>, Jean-Marc Strub<sup>2</sup>, Séverine Massenet<sup>1</sup>, Edouard Bertrand<sup>4</sup>, Marc Quinternet<sup>5</sup>, Cosmin Saveanu<sup>3</sup>, Sarah Cianférani<sup>2</sup>, Stéphane Labialle<sup>1\*</sup>, Xavier Manival<sup>1\*</sup>, Bruno Charpentier<sup>1\*</sup>

<sup>1</sup> Université de Lorraine, CNRS, IMoPA, Nancy F-54000, France

<sup>2</sup> Laboratoire de Spectrométrie de Masse BioOrganique, Université de Strasbourg, CNRS IPHC UMR 7178, F-67000 Strasbourg, France

<sup>3</sup> Génétique des Interactions Macromoléculaires, Département de Génomes et Génétique, Institut Pasteur (UMR3525-CNRS), F-75015 Paris, France

<sup>4</sup> IGH, CNRS, Université de Montpellier, F-34293 Montpellier, France

<sup>5</sup> Université de Lorraine, CNRS, INSERM, IBSLor, Nancy F-54000, France

These authors contributed equally: Benoît Bragantini, Christophe Charron, Maxime Bourguet, Arnaud Paul

These authors jointly supervised this work: Bruno Charpentier, Stéphane Labialle, Xavier Manival

\* Correspondence

[bruno.charpentier@univ-lorraine.fr](mailto:bruno.charpentier@univ-lorraine.fr), Tel : +33 3 72 74 66 27; Fax: +33 3 72 74 65 45

[stephane.labialle@univ-lorraine.fr](mailto:stephane.labialle@univ-lorraine.fr), Tel : +33 3 72 74 66 51

[xavier.manival@univ-lorraine.fr](mailto:xavier.manival@univ-lorraine.fr), Tel : +33 3 72 74 66 91

Present Address:

Bragantini Benoît, Department of Biochemistry and Molecular Biology, Mayo Clinic, Rochester, Minnesota, 55905, USA

Rothé Benjamin, Ecole polytechnique fédérale de Lausanne (EPFL) SV ISREC, Station 19, CH-1015 Lausanne, Switzerland

## Supplementary Introduction

The PAQosome was found in association with sub-complexes of RNA polymerase II<sup>1</sup> (RNAPII) and participates in its assembly in cytoplasm<sup>2</sup>. It is also involved in the stabilization and assembly of phosphatidylinositol 3-kinase-related kinases (PIKKS)<sup>3-6</sup>, the U4 and U5 small nuclear RNPs<sup>7-9</sup>, RNA polymerases I and III<sup>2,10</sup> and the TSC complex, a tumor suppressor and important regulator of mTOR<sup>8,9</sup>.

## Supplementary Figures

**a****Assembly of Bcd1p<sub>FL</sub> and Rtt106p-M followed by native IM-MS**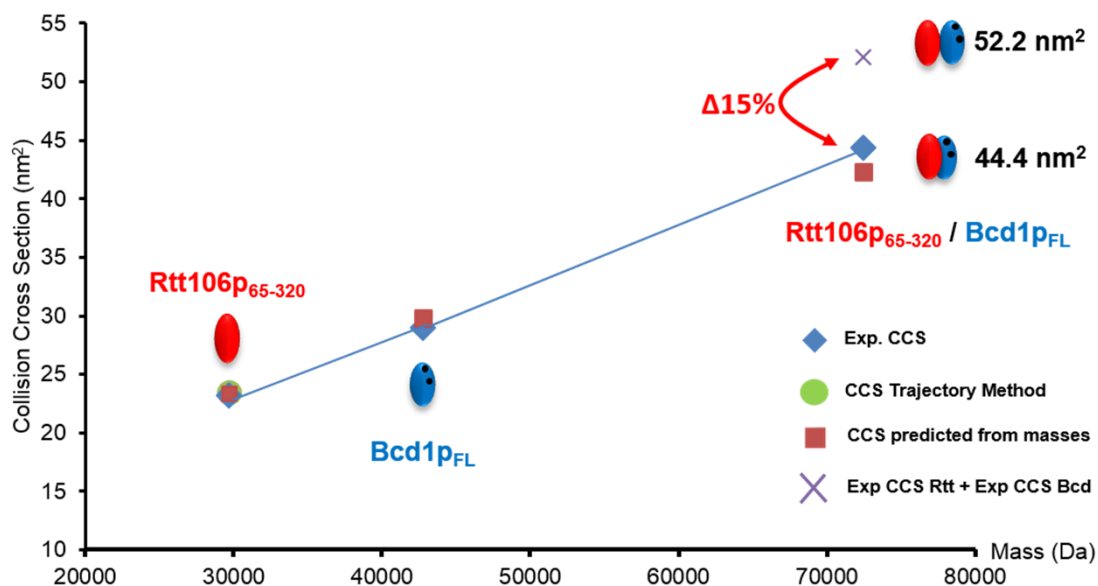**b**

| Protein                                         | Experimental CCS (nm <sup>2</sup> ) | CCS predicted from masses (nm <sup>2</sup> ) | CCS Trajectory Method (nm <sup>2</sup> ) |
|-------------------------------------------------|-------------------------------------|----------------------------------------------|------------------------------------------|
| Bcd1p <sub>FL</sub>                             | 29.0 ± 1.5                          | 29.8                                         | -                                        |
| Rtt106p <sub>65-320</sub>                       | 23.2 ± 1.9                          | 23.4                                         | 23.5                                     |
| ∑ CCS <sub>exp</sub>                            | 52.2 ± 3.4                          | 53.2                                         | -                                        |
| Bcd1p <sub>FL</sub> / Rtt106p <sub>65-320</sub> | 44.4 ± 1.4                          | 42.3                                         | -                                        |

**Fig. 1 Assembly of Bcd1p and Rtt106p-M followed by native IM-MS.** **a** The native Ion Mobility-Mass Spectrometry (IM-MS) parameters were fine tuned in order to measure the arrival time distributions (ATDs) of each most abundant charge state for individual partners and complex in the same IM cycle and to avoid ion activation in the IM cell (see Methods section). Theoretical Collision Cross Sections (CSS) were calculated with Mobcal while Predicted CCS from masses were estimated from Ruotolo et al. (2008)<sup>11</sup> :  $\Omega = 2.435 \times Mw^{2/3}$ . **b** Measured CCSs obtained for each individual subunit and for the Bcd1p<sub>FL</sub>:Rtt106p-M complex were then compared to CCS values deduced either from the mass or from 3D structures when available. A significant difference of -15 % in CCS was observed between the juxtaposed model and the measured IM-MS CCS, arguing strongly in favor of a close imbrication of Bcd1p<sub>FL</sub> and Rtt106p-M upon complex formation.

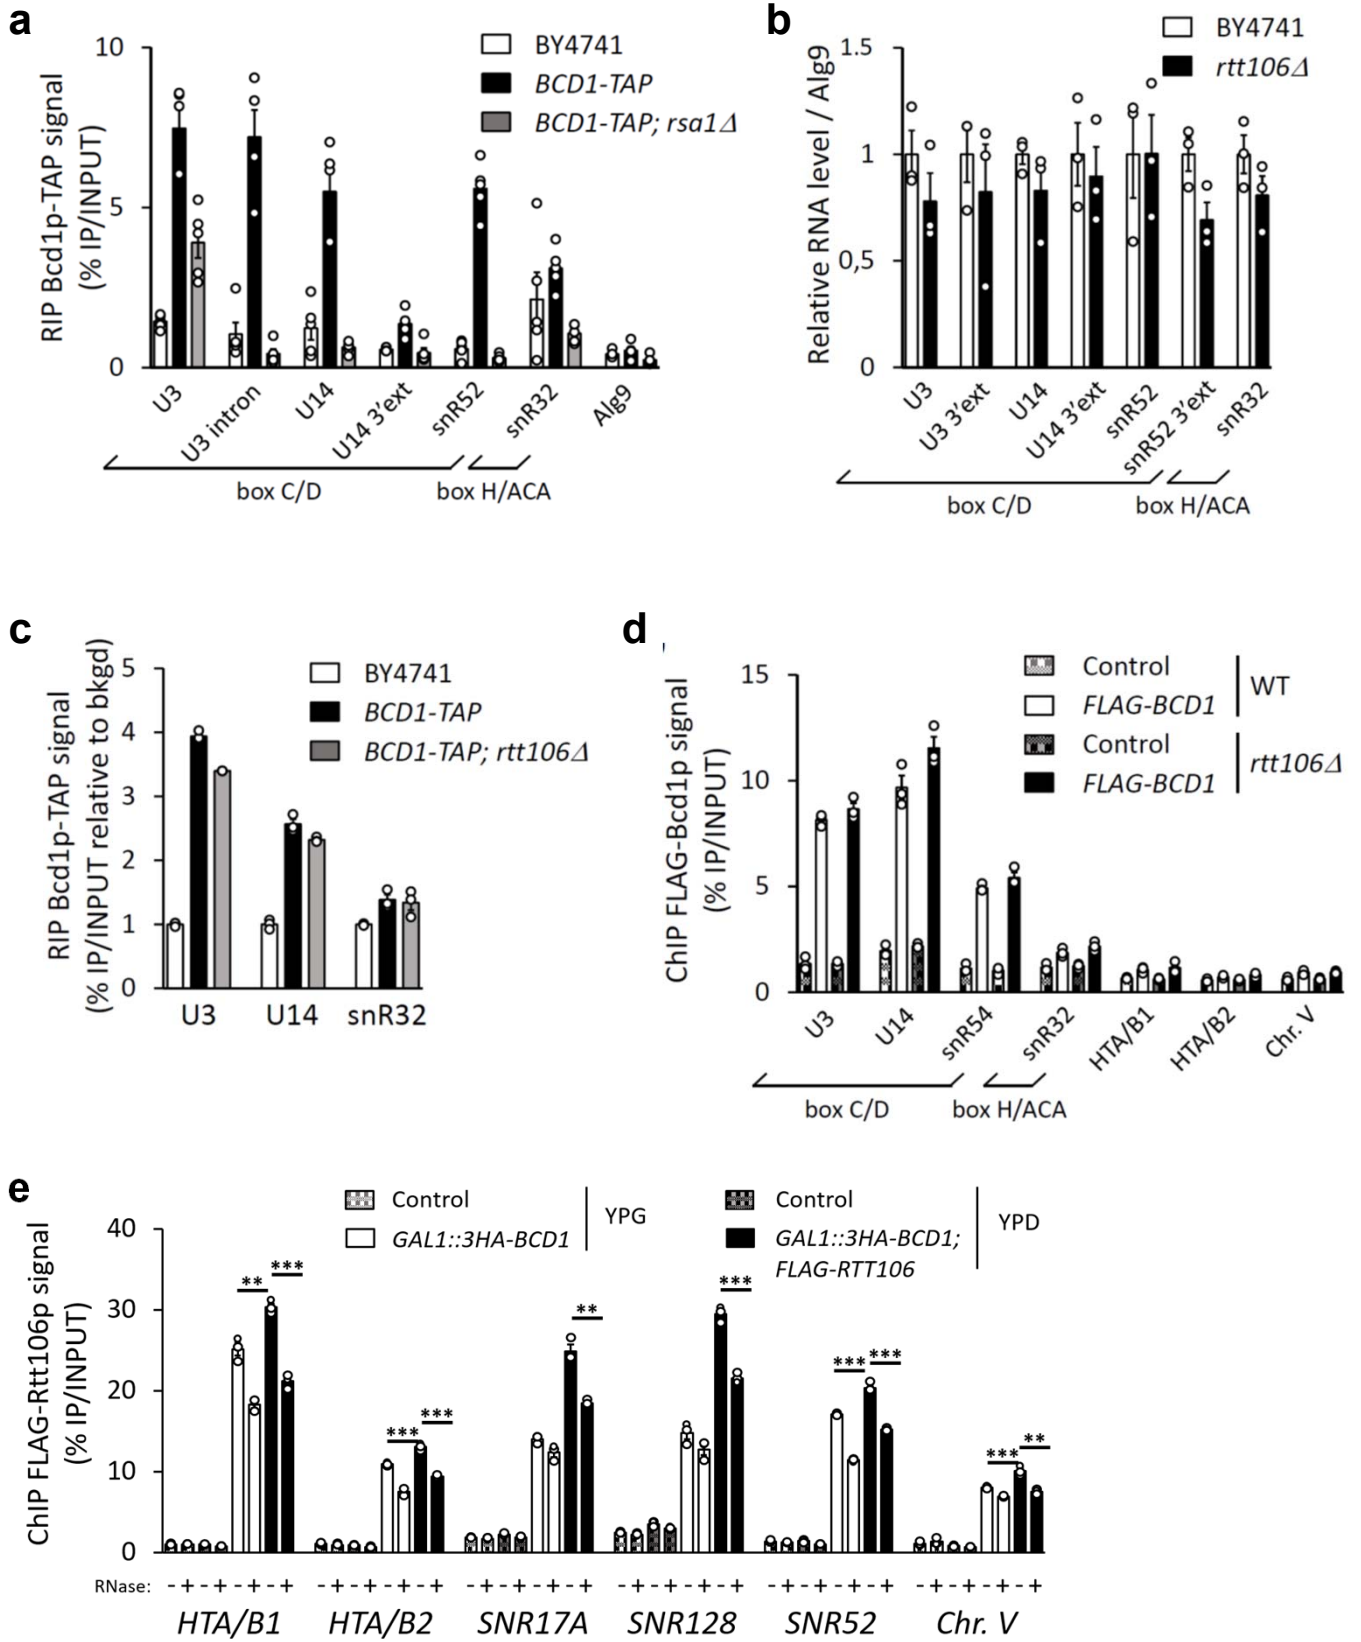

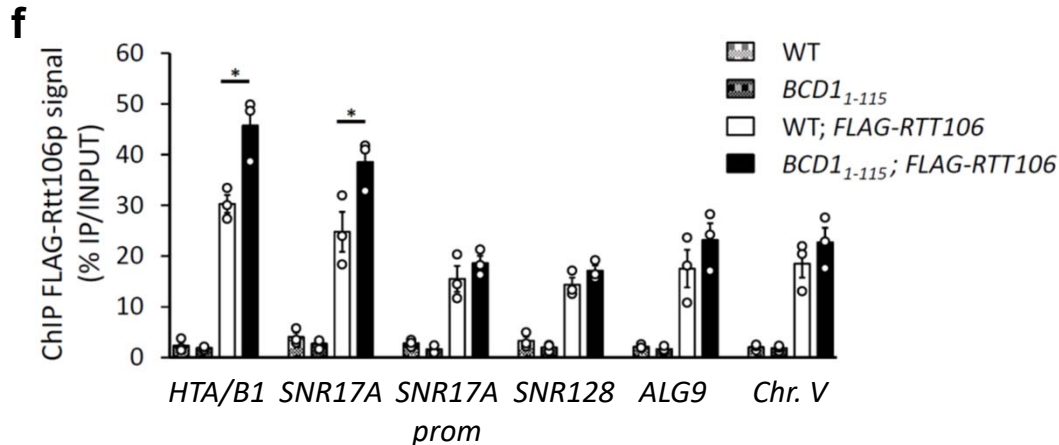

**Fig. 2 Rtt106p does not contribute to association of Bcd1p to snoRNAs loci nor to the steady state level of snoRNAs.** **a and c** Association of Bcd1p with RNAs. RNA immunoprecipitation (RIP) assays were performed on extracts prepared from WT *BCD1-TAP* cells and cells disrupted of the *RSA1* (*rsa1Δ*) or *RTT106* (*rtt106Δ*) ORFs. The cells were cultivated in the presence of galactose (YPG) or shifted to a glucose containing medium (YPD) for 6 h before preparation of the extract. IP was performed using IgG-sepharose beads. Data are mean values plus standard error of the mean of four to five (panel A) and three (panel C) biological replicates. **b** Quantification of snoRNAs. RT-qPCR analyses were performed on total RNAs extracted from WT BY4741 strain and mutant KO for the *RTT106* ORF (*rtt106Δ*). The *ALG9* gene was used as an endogenous control. Relative RNA expression of WT strain was set to one. Data are mean values plus standard error of the mean of three biological replicates. **d** Chromatin immunoprecipitation (ChIP) assays were performed on yeast *FLAG-BCD1* cells with (*rtt106Δ*) or without the disruption of the *RTT106* ORF. Cells were cultivated in YPG or shifted to YPD medium before ChIP assays. Cells expressing non-tagged Bcd1p were used as controls and IP was performed using anti-FLAG antibody. Data are mean values plus standard error of the mean of three biological replicates. **e** ChIP assays performed on yeast *GAL1::3HA-BCD1* transformed by empty or *FLAG-RTT106* expression vector. The BY4741 strain was used as control. Cells were cultivated in YPG or shifted to YPD medium before ChIP assays. Before incubation with anti-FLAG agarose beads, the cell lysate was incubated (+) or not (-) with RNases A/T1 (Paul et al., 2019). Data are mean values plus standard error of the mean of three biological replicates. Two-tailed t-tests (\* $P < 0.05$ , \*\* $P < 0.01$ , \*\*\* $P < 0.001$ ). RNase + versus RNase - in YPG: \*\* = 0.002 for *HTA/B1*, \*\*\* = 0.0003 for *HTA/B2*, \*\*\* = 2.94 E-6 for *SNR52*, \*\*\* = 0.0005 for *Chr. V*. RNase + versus RNase - in YPD: \*\*\* = 0.0002 for *HTA/B1*, \*\*\* = 0.0002 for *HTA/B2*, \*\* = 0.002 for *SNR17A* (U3), \*\*\* = 0.0003 for *SNR128* (U14), \*\*\* = 0.0002 for *SNR52*, \*\* = 0.003 for *Chr. V*. **f** ChIP assays performed on WT or *BCD1*<sub>1-115</sub> yeast strains. Cells were cultivated in YPG or shifted to YPD medium before ChIP assays. Cells expressing non-tagged Rtt106p were used as controls and IP was performed using anti-FLAG antibody. Data are mean values plus standard error of the mean of three biological replicates. Two-tailed t-tests (\* $P < 0.05$ , \*\* $P < 0.01$ , \*\*\* $P < 0.001$ ). WT; *FLAG-RTT106* versus *BCD1*<sub>1-115</sub>; *FLAG-RTT106*: \* = 0.018 for *HTA/B1*, \* = 0.047 for *SNR17A* (U3).

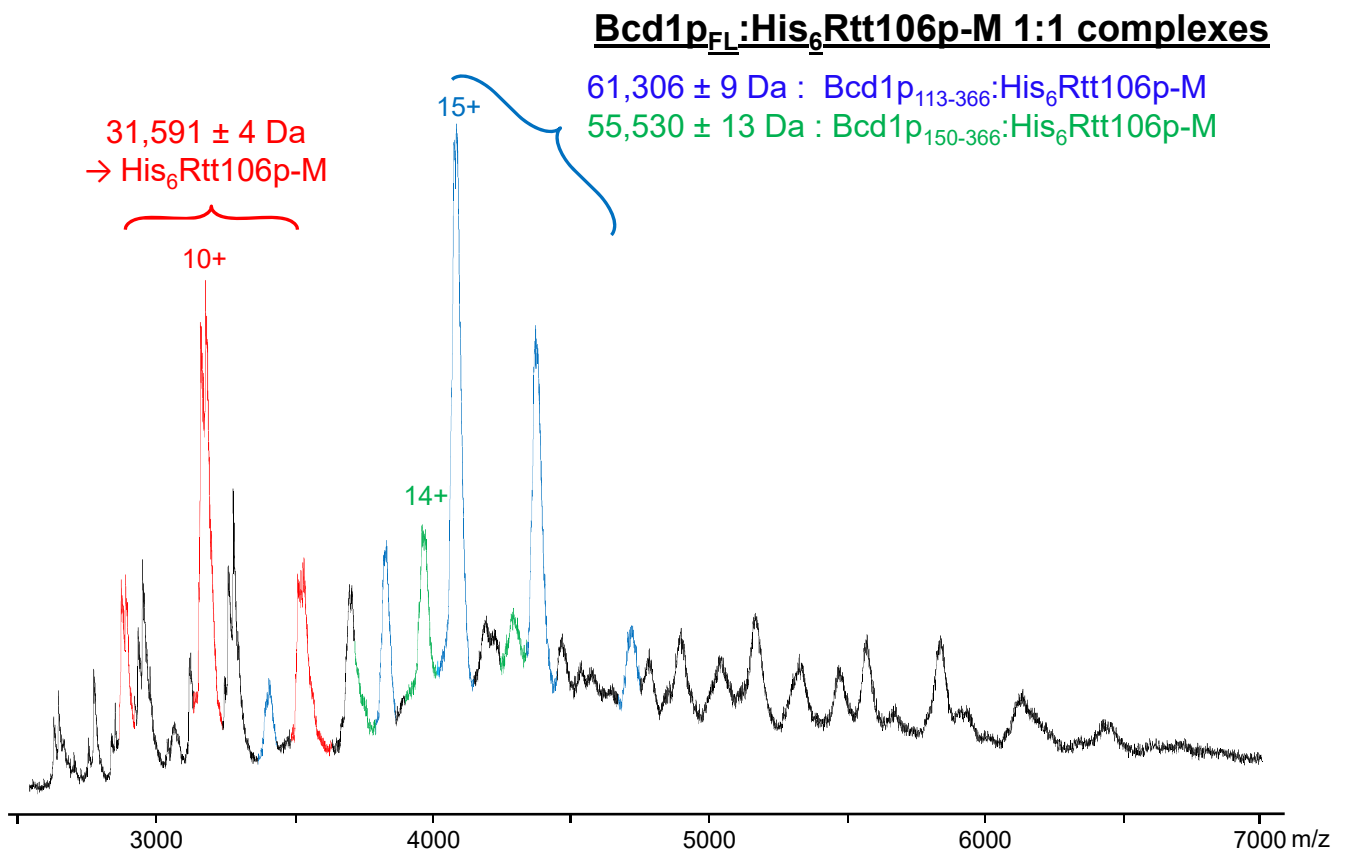

**Fig. 3 Limited proteolysis followed by non-denaturing mass spectrometry analysis of Bcd1p<sub>FL</sub>:His<sub>6</sub>Rtt106p-M.** After 4 h of tryptic digestion, we observed that His<sub>6</sub>Rtt106p-M was almost completely resistant to enzymatic digestion, only one C-terminal amino acid was removed (red trace). In the other part, two other species corresponding to two 1:1 Bcd1p:His<sub>6</sub>Rtt106p-M complexes were detected: the major species corresponds to truncated Bcd1p<sub>113-366</sub> in interaction with His<sub>6</sub>Rtt106p-M (blue trace), while a minor species corresponding to a smaller fragment of Bcd1p<sub>150-366</sub> still in interaction with His<sub>6</sub>Rtt106p-M (green trace) was also detected (all identified fragments were validated by LC-MS/MS, data not shown). Molecular weight is shown in Dalton.



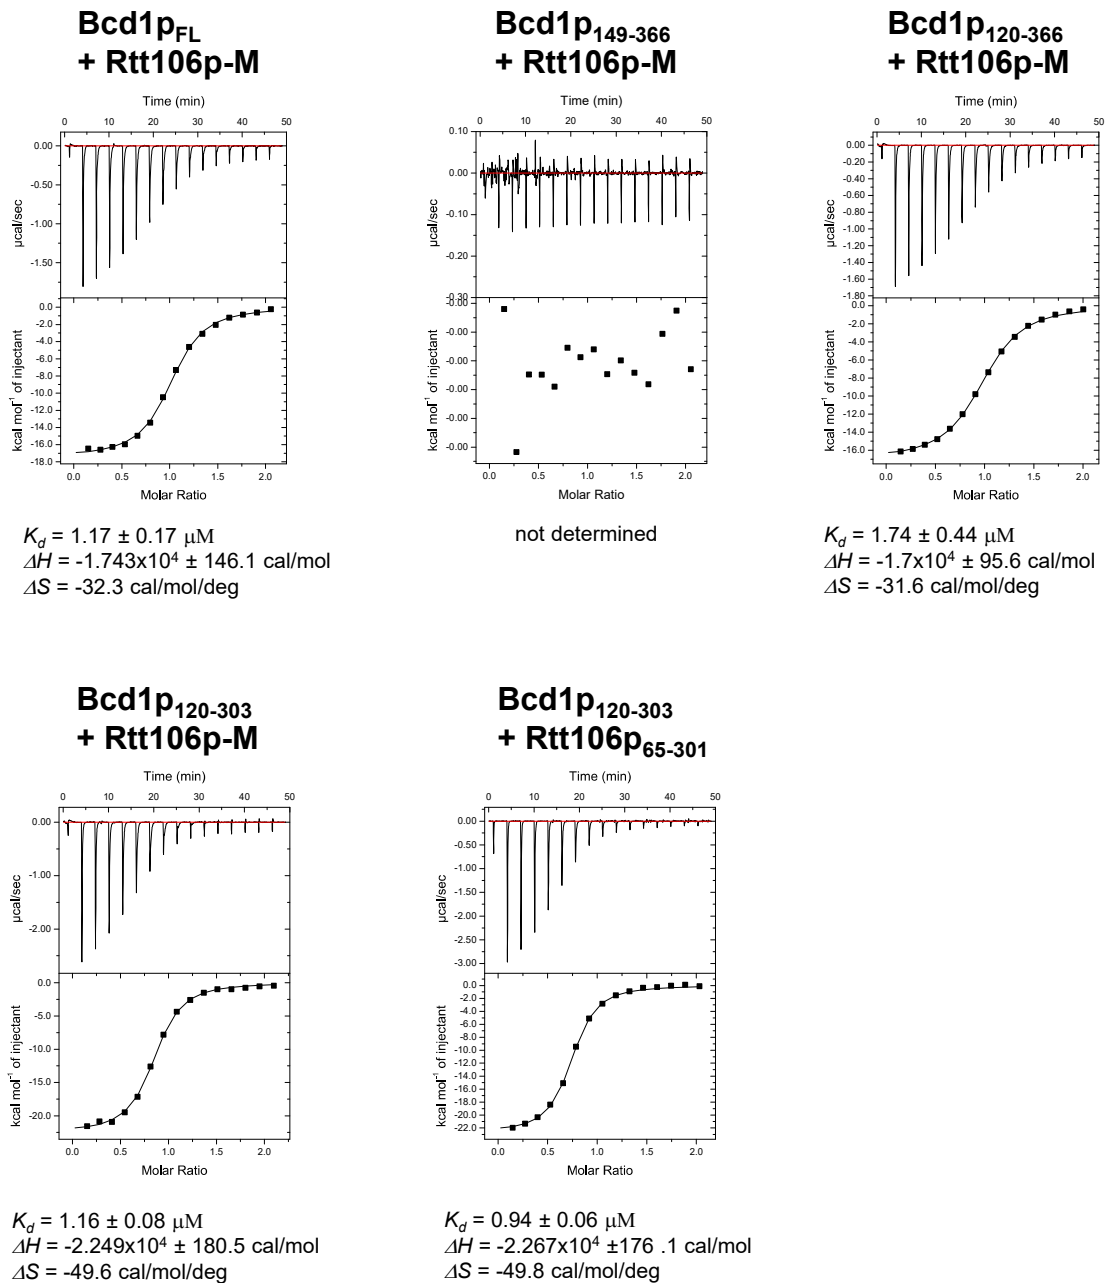

**Fig. 4 Interaction analysis between Bcd1p and Rtt106p fragments by isothermal titration calorimetry (ITC).** ITC results between (from left to right) Bcd1p<sub>FL</sub> with Rtt106p-M, Bcd1p<sub>149-366</sub> with Rtt106p-M, Bcd1p<sub>120-366</sub> with Rtt106p-M, Bcd1p<sub>120-303</sub> with Rtt106p-M, and Bcd1p<sub>120-303</sub> with Rtt106p<sub>65-301</sub> recorded at 293 K in buffer containing 10 mM NaPi at pH 7.5, 150 mM NaCl and 0.5 mM TCEP. The calculated dissociation constant ( $K_d$ ), and the variations in enthalpy ( $\Delta H$ ) and entropy ( $\Delta S$ ) are indicated.

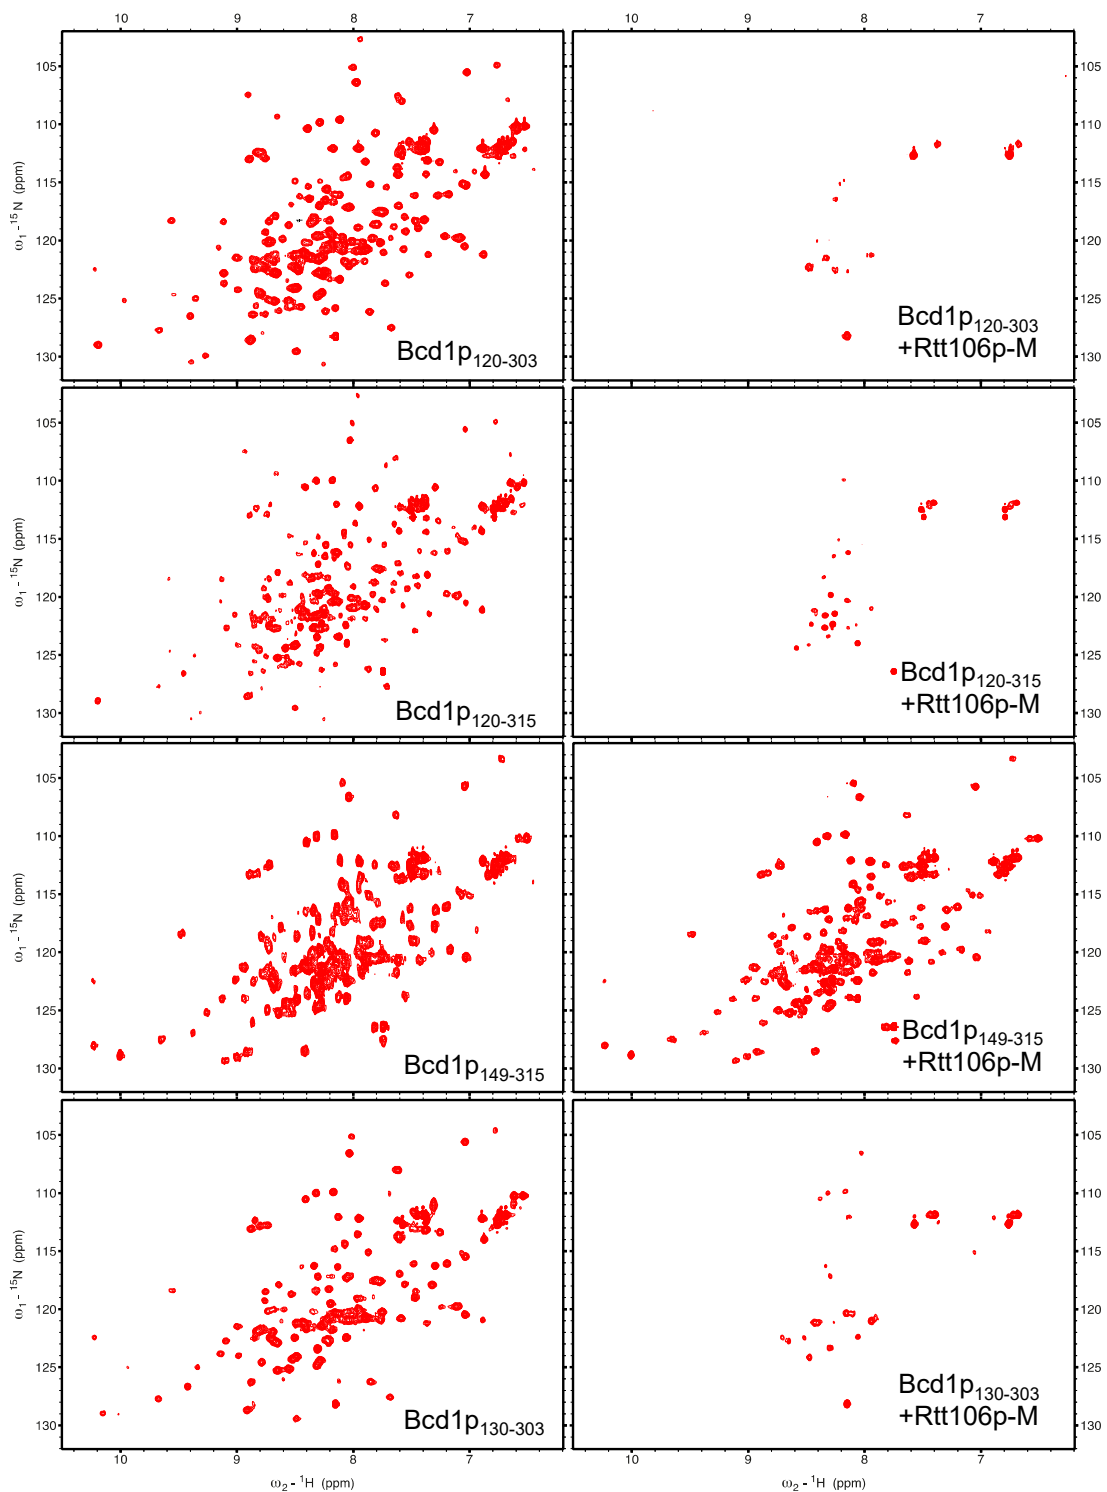

**Fig. 5 Interaction analysis between Bcd1p and Rtt106p fragments by NMR titrations.** NMR  $^1\text{H}$ - $^{15}\text{N}$ -HSQC of Bcd1p fragments alone (on left) or with Rtt106p-M (on the right). Bcd1p fragments tested are (from the top to the bottom) Bcd1p<sub>120-303</sub>, Bcd1p<sub>120-315</sub>, Bcd1p<sub>149-315</sub> and Bcd1p<sub>130-303</sub>. Spectra were recorded at 293 K with protein concentration of 200  $\mu\text{M}$  in 10 mM NaPi buffer (pH 6.4), 150 mM NaCl and 1 mM DTT.

**a**

```
BCD1_SACCE ----- 0
BCD1_HUMAN MEFAAENEGKSGGLHSVAEGVRLSPEPGREGVRDLAAGEEFGGGEEGTGLTGIKEIGDG 60
BCD1_MOUSE MESAAEKEGTPGGGSQRVAEGARPRPAAGGEGARDLDGSPEAGDGEERGLAGTKTTE-- 58

BCD1_SACCE ----- 0
BCD1_HUMAN EEGSGQRPEEIPMDLTVVKQEIIDWPGTEG-RLAGQWVEQEVEDRPEVKDENAGVLEVKQ 119
BCD1_MOUSE -----DAEEIKMDLAVVKQEVVDWSDLDSGVADSQWVKQEVVEGGPEVKDE-KGVLEVKQ 111

BCD1_SACCE ----- 0
BCD1_HUMAN ETDSSLVVKEAKVGEPEVKKEEK--VKEEVMWSEVKEEKDNLEIKQEEKFVGGQCIKEELM 177
BCD1_MOUSE EADSSLVVKEEEVDEPEVKKEEKVKVKEEVTDWEEVKEEDLTI---KQELFVGGQNVKEEQV 168

BCD1_SACCE -----MAVLCGVCGIKEFKYKCPRLV 22
BCD1_HUMAN HGECVKEEKDFLKKEIVDDTKVKEEPPINHPVGCKRKLAMSRCECTGTEEAKYRCPRCMR 237
BCD1_MOUSE MDAAPIKEEGSLKSEAMEDAKVKEEPPQMNPRVGSKRKLALSRCECTGTEEAKYRCPRCMR 228
* .** :* **:*****:

BCD1_SACCE QTCSLECSKHKHTRDNCSGQTHDPKEYISSEALKQADDDKHERNAYVQRDYNLTQLKRM 82
BCD1_HUMAN YCSLPCVKKHKAELTCNGVRDK-TAYISIQQFTE-----MNLSDYRFLEDVART 287
BCD1_MOUSE FCSLPCVKKHKADLTCSGVRDK-TAYVSLQQFTE-----MNLSDYRFLEDVART 278
:*** * ****: .*.* .. .*: : :: : **:* : : *

BCD1_SACCE VHVQKMDARMKNKRVLGPGVGGHNSNFKKRRYDIDEDDRDSTECQRIIRGVNCLMLPKGM 142
BCD1_HUMAN ADHISRDAFLK-----RPISNKYMYF-----MKNRARRQGINLKLPLNGF 327
BCD1_MOUSE ADKVSRTFLK-----RPKRKKYLFF-----MKNRARKQGIYLRLLPLNGF 318
.. . * : * * : * : * : * : * : * : * : * : * : * : * : * : * : * : *

BCD1_SACCE QRSSQNRSKWDKTMDFVWSVEWILCPMQEKGEKKELFKHVSHRIKETDFLVQGMGKNVF 202
BCD1_HUMAN TKRKENSTFFDKKKQQFCWHVKLQFPQSAEYIEKRVPDDKTINEILKPYIDPEKSDPVI 387
BCD1_MOUSE SKRKENSTVFDHRKQQFCWHVKLQFPQSAEYIEKRVPDDKTINEILKPYIDPEESDPVI 378
: .:* : * : * * * : : * : :* : . : . : . : : . : * :

BCD1_SACCE QKCEFYRLAGTSSCIEGEDGSETKEERTQILQKSGLFYTKTFPYNTTHIMDSKKLVEL 262
BCD1_HUMAN RQRLKAYI-----RSQTVQIL-MKIEYMQQLVY-YYELDP----- 422
BCD1_MOUSE RQRLKAYA-----QSQTVQIL-MRVENMQQNMIR-YHELDP----- 413
: : * : : * : : : :* : : * : *

BCD1_SACCE AIHEKCIGELLKNTTVIEFPTIFVAMTEADLPEGYEVLHQEPRPLEHTSTLNKFIDNARE 322
BCD1_HUMAN ---YKSLDNLNRNKVIEYPTLHVVLKGSNN--DMKVLHQVKSEST-----KNVGNEN- 470
BCD1_MOUSE ---YKSLSDNLKDKVIEYPTLHVVLRGSSN--DKQLL-QVKSESA-----QKLGNGN- 460
* . : : * : : : * : * : * : * : : . : . : * * : : * .

BCD1_SACCE EEDAEEDSQPTEEPVQKETQDASDSDSDDSDYDNPGLSMDFLTA 366
BCD1_HUMAN ----- 470
BCD1_MOUSE ----- 460
```

b

```

BCD1_SCHPO -----MSENRLGICSTCQKNASKYRCPRCDS 26
BCD1_TALIS -----MSEPLLELCTICHTTTPPKYTCPRCAI 27
BCD1_SACCE -----MAVLGCVCGIKEFKYKCPRCLV 22
BCD1_CANGL -----MGLCEVCNVEEFKYKCPRCFK 21
BCD1_CANAL -----MDFGEENTVCTICHENKSKYTCPACEI 27
BCD1_CANKR -----MHCEICKKIEHKYVCPRCKL 20
BCD1_YARLI MH-----ELKRFTI-QKKEKNHTHTHTHTQTTHSMSCSICQQ-ESKYRCFACSA 50
                                     * * * * *

BCD1_SCHPO RFCCLECNLEHKRLTKCSGERDPAT----FVPKSKLV-----NHLNSDFNFLSG 71
BCD1_TALIS RTCSLACARRHKNWSQCSGVRDPAA----YATRAELQ-----TASALDRDFNFIG 74
BCD1_SACCE QTCSLECSKHKTRDNCQSGQTHDPK----EYISSEALKQADDDKHERNAYVQRDYNLTQ 78
BCD1_CANGL KTCSLACSKQHKADESCSGKSHDPT----AYIPRTDIKEADDEHESNILVQRDYNLIN 77
BCD1_CANAL KTCSLQCYNKHKYERDCTGKVDNSNK----YLNRSSELAS-----DPVHLNRDYNFLNN 75
BCD1_CANKR RTCSLPCFKQHKIDKKCSGLSDISLGRDRTYIDKK-QL-----DSNDVQRDYNFLK 71
BCD1_YARLI RTCSLACSKQHKADEKCSGLPDPK----YLNREALF-----TDSVNRDYNRFLK 97
                                     * * * * *

BCD1_SCHPO VERLINRKENGSHQVS-----NRAERNRLQ-----LKR----- 99
BCD1_TALIS VERGLERAEREAREARGFVDLDHEYMQDPKNKRKRKRDRGSKEEAAGGGGAGGSKLVKGE 134
BCD1_SACCE LKRMVHVQKMDARMKKNKVLGPGVGHNSNFKKRKYDIDEDD-----RDST--ECQ----- 126
BCD1_CANGL MRREVEVQIDDSKRKNRILREIYDPYMANR-----QR-----GNSD--NSS----- 118
BCD1_CANAL VDRKIHVGKEDIKSAKNVFKRTRNQSRAPGNKRHK--RND-----EDNT--DKRIMAVK 126
BCD1_CANKR VNRSLDLGKRRKS--EMKILKTVGNRRN--GNFS-----NNGI--NSK----- 108
BCD1_YARLI LERDIVVRKQDGE--SMPIFKRARYNQ--R-----KDGK--DGS----- 131
: *

BCD1_SCHPO -----SLERAGINIKFAPPSNKKRRLNRTHYDKKSHLIKWSIEWCLHESSTSK--- 147
BCD1_TALIS LAFLR----AAQDAGVKVERSPRGMTRNKENKSRFHPKHKCLSWTVDWIHTAGRSRV--- 187
BCD1_SACCE -----RIIRRGVNCMLPKGMQRSSQNRSKWDKTMDFVWSVEWILCPMQEKGEKK 177
BCD1_CANGL -----RLIRRGVSCMLPKGMQRSLQNKSKWDNSLNQFTWTIEWVLCGDG----- 163
BCD1_CANAL KVFLNEPTISIKRENTLIVSLPIGMSRSNTNKTGFDKKLNFSVWTIEWIVLNDQGEQ--- 183
BCD1_CANKR -----WVPTRGVKVKKVPLGEMERGLNKGSG--GKGNWAWTIEWLLIDENKVV--- 154
BCD1_YARLI -----VMERNGVKIHKVAQGMGRQRNHSRWDPNIKQFCWTVWVVDNETM--- 179
                                     . . : * : . * :.

BCD1_SCHPO -----DLTDEASENTIITHSHPESEPLEKIFRKLVEENSEMNSQ----- 186
BCD1_TALIS -VQNYLETI-----TI-----G-----Q-AYDRAYPPLPEATS----- 214
BCD1_SACCE ELFKHVSHRIKETDFLVQGMG-----KNVFQKCEFYRLAGTSSCIEGEDGS----- 224
BCD1_CANGL DTVTHLTHRAKENESVVEGIS-----KIVFNKIQTIFYKIENGDDG--ETQAV----- 208
BCD1_CANAL -MTKFISYRLKESLILQD-----SVPMNIINNKLNQ----- 213
BCD1_CANKR -IDRYVKYKSGESSILRT-----IVPRAWICGGDEY----- 184
BCD1_YARLI -TVDKVNPV---QSLLEC-----FQKRGSEKGGNGDNKGERKVEKNDTEQT 221
: :

BCD1_SCHPO -----VS---KA-NIHAPDDMQFMIKSRKSRK-----GFIYKKEIPEPSNLSS 225
BCD1_TALIS -----TPKEENKTEPFPFRNIYIYIRRQ-----ADSHIVLAPLHPEAKLAD 256
BCD1_SACCE -----ETKEERTQIL-QKSGLKFYTKTFPYNTTHIMDSKKLVELAIHEKCIGE 271
BCD1_CANGL -----LSREDRIAL--KDYNLEFYIKWFPYNTTEMSDSRNLRIDAVNSTLGD 255
BCD1_CANAL -----PV-EKSHLKFYLDVVIHKNKMI-----R-LNSEEKISD 244
BCD1_CANKR -----TILFKDLE--SG-----VFEV-VDKDAKLE 207
BCD1_YARLI EMKDEHSKQKDGDKDEKEEVV-PLTPRSFYMKRIKSKNT-----SPIL-LDSPKPLSE 273
: :

BCD1_SCHPO CLRNSFVFEVPTIHVFTSTTQ-VHTE-----SS----YETSSSEQSDSSSSSSSC 270
BCD1_TALIS VLRGRTVYVEYPRLYVKSESPADIESGAVDETHVLEETWLR--NNPTGIEAQDDDESDDWTSS 315
BCD1_SACCE LLKNTTVIEFPTIFVAMTEAD-LPEGYE---VLHQEP---RPLEHTSTL---NKF--- 316
BCD1_CANGL VFKNRTVIEFPTIYITKSVQD-LPKGFK---VMIEEK---GSAPGSEEN---SRV--- 300
BCD1_CANAL VLKDKIVLEYPTIYVTANDEC-LQDRIIDEFQLADEED--DDATGSSTD-----ESSSD 296
BCD1_CANKR VLLNKLVIFPTMYIFKGDSS-IITREK--V---LDD---DLSSG----- 243
BCD1_YARLI NLKDKSVVEYPTIYYTNEEIV-ASDSDSDSD---SDS---DNDSG----- 311
: . : * * :.

BCD1_SCHPO --ISDS-----ESSSDDELNELSNEKKANSPTQNVDTSS---KLSSVKF-QNED 314
BCD1_TALIS EGSSEE--SEDDDESETGSDSDSESESQVS-DVKE-----ETA----- 350
BCD1_SACCE -----I--DN-AREEEDAEDSDQPTTEPV-Q-----KETQDAS-DSDS 349
BCD1_CANGL -----NVAGSGSSSDTETDDSDAEPEEES--KQDNTQKNVVVENVSEATAIVDK-DTSD 353
BCD1_CANAL DGSDSDTSSVGDSSDEDNDSAPPEETSS-KLPPFSQTFPETERS--DSKPIIEEIGSSE 353
BCD1_CANKR --SSSDAS--SDSSSDSSSDTPEEISS--KPLET----- 275
BCD1_YARLI --SDSDSDS--DDSDSDSDSDSDSAPPEESA-RQPEMPDIVKTL-A--DS-AVNDMAGLED 363

BCD1_SCHPO DEDRRKNSDGEASYSPLPFLGYSYFQKQGQY 345
BCD1_TALIS ----- 350
BCD1_SACCE DSD-DDYNPGLSMDF---LTA----- 366
BCD1_CANGL EED-DDYNPGVSLDF---LMS----- 370
BCD1_CANAL VVE-EP----- 358
BCD1_CANKR ----- 275
BCD1_YARLI AFE-KAQEEGKQ----- 374

```

**Fig. 6 Highlights of the conserved fragment 120-303 of Bcd1p (in bold).** **a** Sequence alignment of Bcd1p<sub>120-303</sub> from *Saccharomyces cerevisiae* (top), ZNHIT6 (also called BCD1) from *Homo sapiens* and from *Mus musculus*. Amino-acid alignments built with Clustal Omega using sequences of yeast (Bcd1p, UniProt entry P38772 [<https://www.uniprot.org/uniprot/P38772>]), human (ZNHIT6, UniProt entry Q9NWK9 [<https://www.uniprot.org/uniprot/Q9NWK9>]), and mouse (ZNHIT6, UniProt entry Q3UFB2 [<https://www.uniprot.org/uniprot/Q3UFB2>]) BCD1 proteins<sup>12</sup>. The consensus symbols stand for “\*” for strictly conserved groups, “:” for groups of very similar properties and “.” for groups of weakly similar properties. The amino acids involved in hydrophobic, electrostatic interactions and hydrogen bonding are shown in bold and dark blue, red, and orange, respectively. **b** Sequence alignment of Bcd1p<sub>FL</sub> from different yeast species. SCHPO, *Schizosaccharomyces pombe* (top, UniProt:O74906 [<https://www.uniprot.org/uniprot/O74906>]); TALIS, *Talaromyces islandicus* (GenBank:CRG83776.1 [<https://www.ncbi.nlm.nih.gov/protein/816194281>]); SACCE, *Saccharomyces cerevisiae* (UniProt:P38772 [<https://www.uniprot.org/uniprot/P38772>]); CANGL, *Candida glabrata* (GenBank:KTB14807.1 [<https://www.ncbi.nlm.nih.gov/protein/961789889>]); CANAL, *Candida albicans* (GenBank:KHC39748.1 [<https://www.ncbi.nlm.nih.gov/protein/723165737>]); CANKR, *Pichia kudriavzevii* (GenBank:AWU76967.1 [<https://www.ncbi.nlm.nih.gov/protein/1402408442>]); YARLI, *Yarrowia lipolytica* (GenBank:AOW05274.1 [<https://www.ncbi.nlm.nih.gov/protein/1078658162>]). The RBD sequence of *S. cerevisiae* is in bold. The color code used for the residues is the same as in **a**.

**a**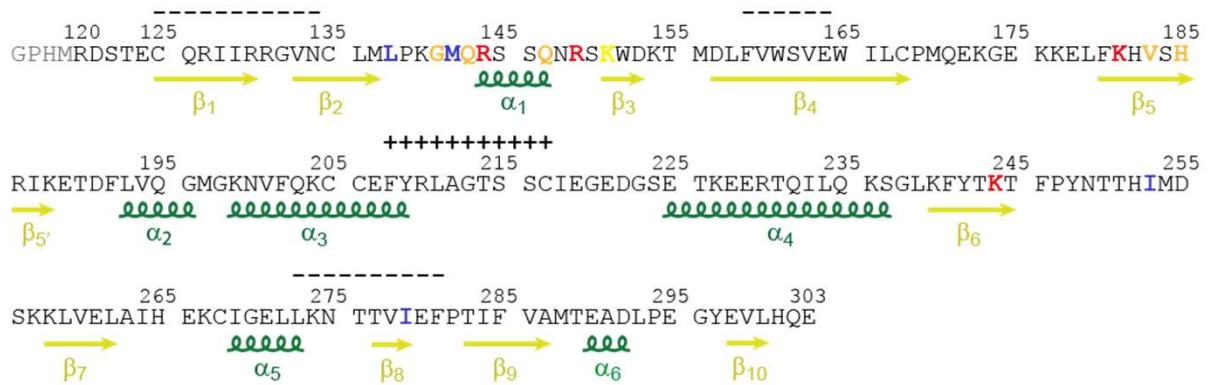**b**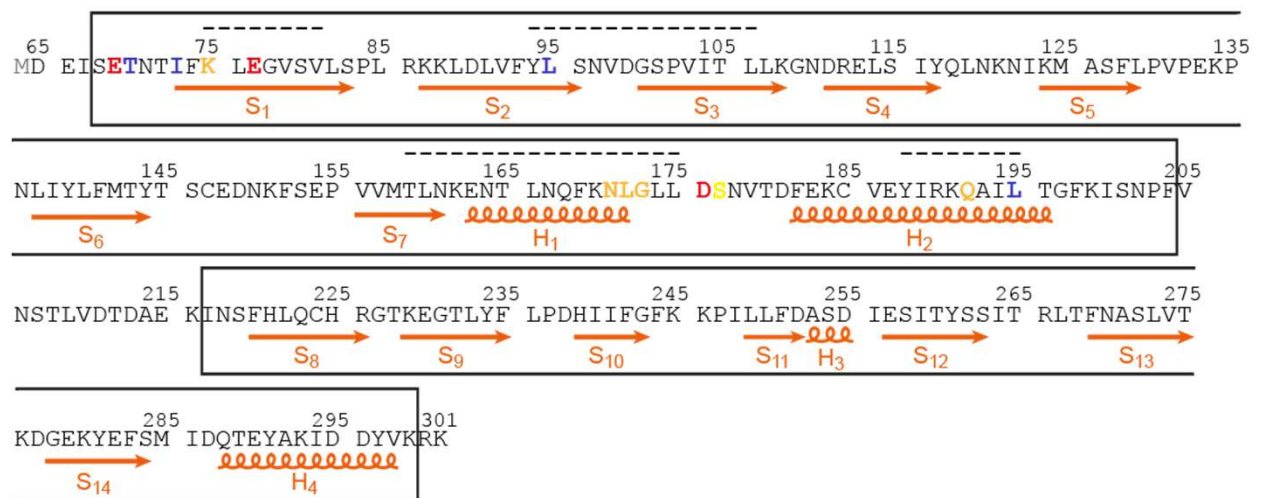

**Fig. 7 Sequences of Bcd1p<sub>120-303</sub> and Rtt106p<sub>65-301</sub> with the summary of NMR, X-ray, cross-linking MS and HDX-MS results. a** Sequence of Bcd1p<sub>120-303</sub>. Secondary structure elements from NMR free structure are indicated below. The β<sub>10</sub> strand is only present in the crystallographic structure. The first four residues (GPHM, in gray and not numbered) correspond to residues of the remaining 6xHistidines tag after cleavage by PreScission protease. The sequence numbering starts at residue R<sub>120</sub> corresponding to the wild type. The cross-linked amino acid with Rtt106p is shown in bold and yellow, and the amino acids involved in hydrophobic and electrostatic interactions, and hydrogen bonding are shown in bold and dark blue, red, and orange, respectively. (-) less exposed residue to solvent after fixation of Rtt106p and (+) residue more exposed to solvent after fixation of Rtt106p (HDX-MS data from Supplementary figure 10). **b** Sequence of protein Rtt106p<sub>65-301</sub> with secondary structure elements from X-ray complex structure below (S=Strand; H=Helix). Amino acids interacting with Bcd1p are indicated with the same legend as in (A). The first frame represents the PH1 domain (68-204) and the second the PH2 domain (217-299). (-) less exposed residue to solvent after fixation of Bcd1p (HDX-MS data from Supplementary figure 10).

**a**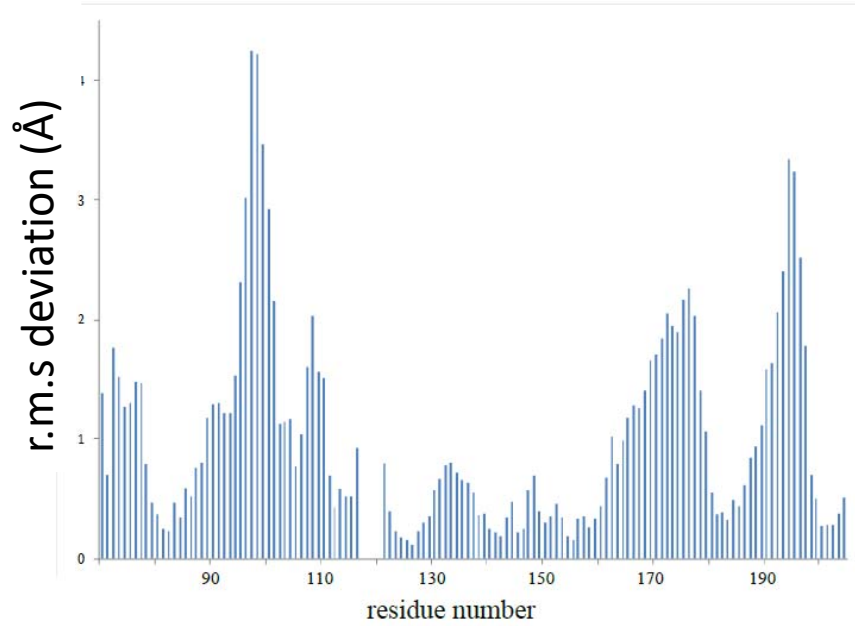**b**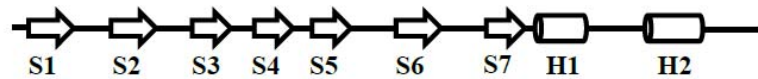

**Fig. 8 Conformational changes of the PH1 domain of Rtt106p upon Bcd1p binding.** **a** Values of R.M.S. deviations calculated by least squares minimized superimposition of PH1 domains. **b** Secondary structure elements of the PH1 domain of Rtt106p are assigned according to the Protein Data Bank (PDB) file entry. The seven  $\beta$ -strands are labeled S1 to S7 and the two  $\alpha$ -helices are labeled H1 and H2. Note that structural modifications occur in  $\beta$ -strands S1 and S2, in the loops S2-S3 and S3-S4, and in the C-terminal region of the PH1 domain including  $\alpha$ -helices H1 and H2 as well as the loop connecting these two  $\alpha$ -helices.

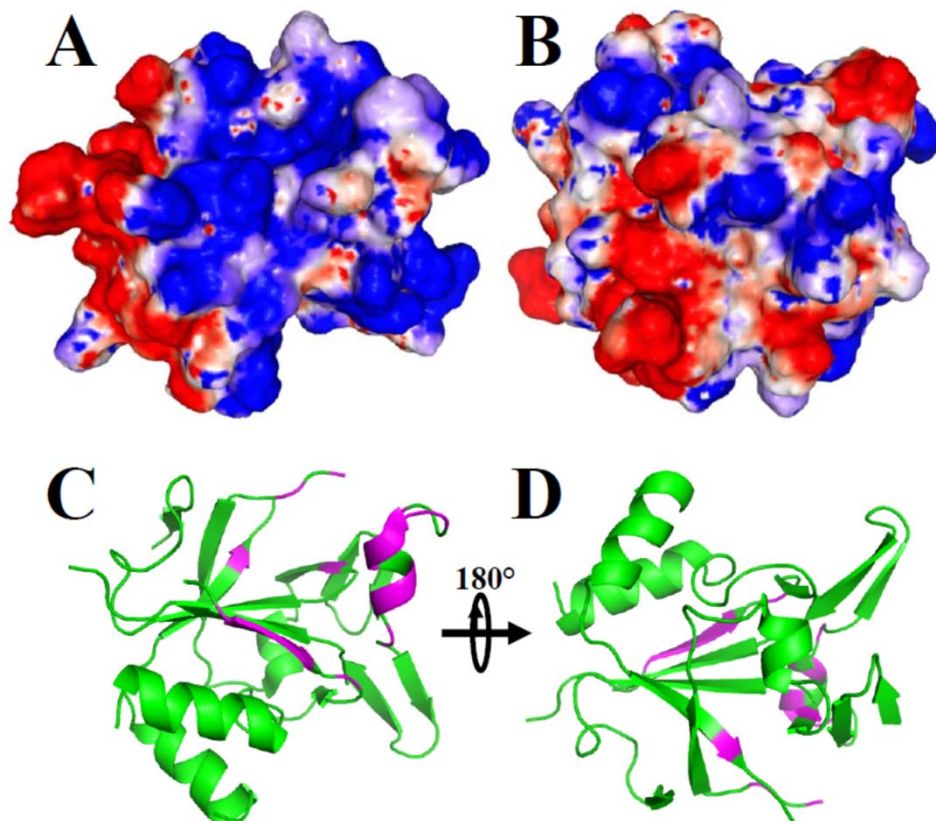

**Fig. 9 Electrostatic properties of Bcd1p<sub>120-303</sub>** (entry PDB code 6NZ2 [<https://www.rcsb.org/structure/6NZ2>]). **a-b** Electrostatic potentials mapped on the molecular surface of Bcd1p<sub>120-303</sub> and viewed in two opposite directions. Blue, white and red regions correspond to positive, neutral and negative electrostatic potentials, respectively (+1 kcal/(mole) in blue to -1 kcal/(mole) in red). **c-d** Opposite views (180 degrees apart) of ribbon representation at Bcd1p<sub>120-303</sub>. Part of the structure that is buried upon binding of Rtt106p is colored magenta. Panel **c** has the same orientation as panel **a** and panel **d** has the same orientation as panel **b**.



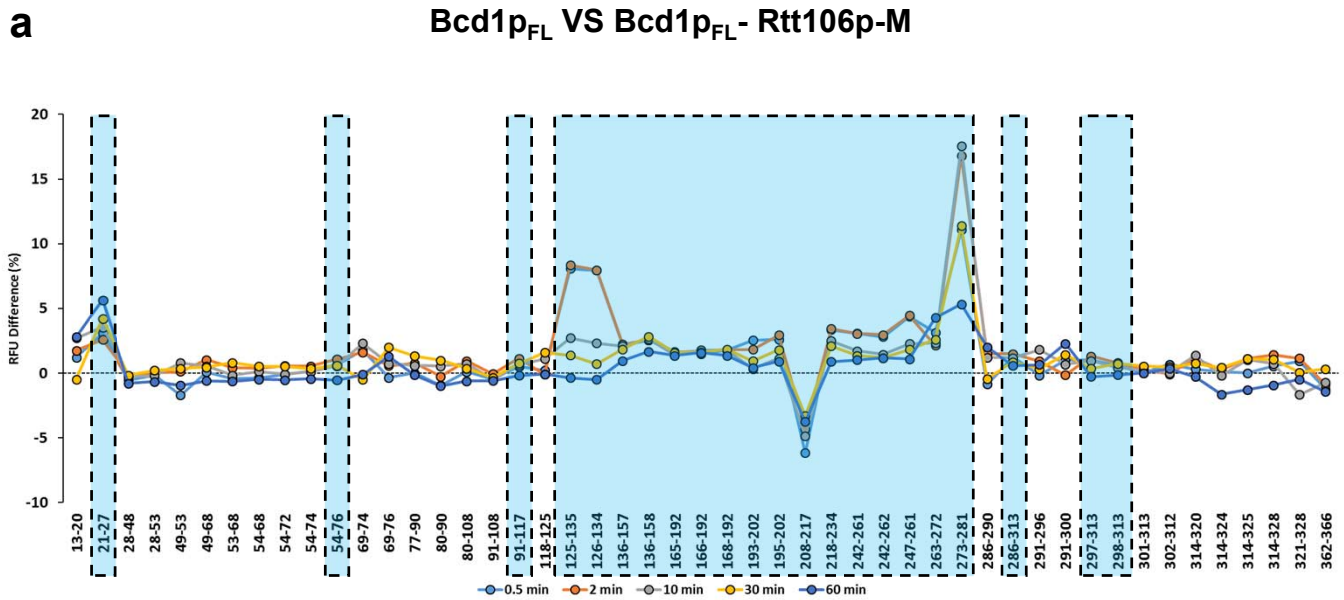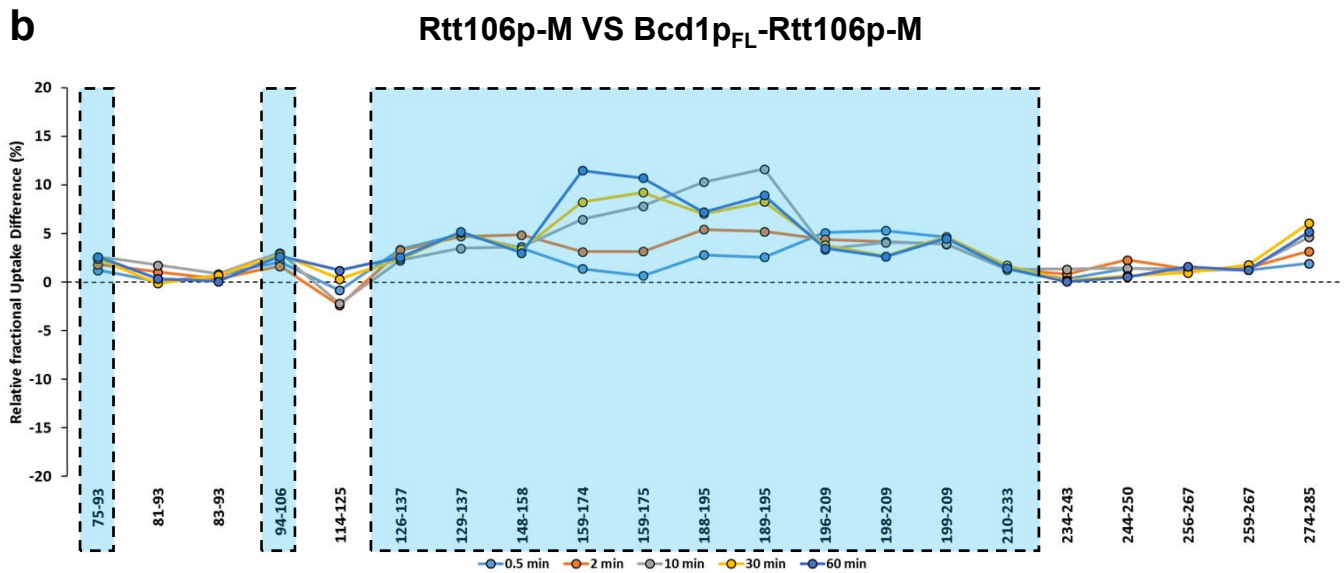

**Fig. 10 Overview of structural mass spectrometry characterization of Bcd1p<sub>FL</sub>:Rtt106p-M complex including HDX-MS. a** Relative fractional uptake difference plot of Bcd1p<sub>FL</sub> vs Bcd1p<sub>FL</sub>:Rtt106p-M HDX experiments. Each point represents the relative fractional uptake of each Bcd1p<sub>FL</sub> identified peptides from Bcd1p<sub>FL</sub>:Rtt106p-M state subtracted from the relative fractional uptake of Bcd1p<sub>FL</sub> peptides from Bcd1p<sub>FL</sub> alone state (light blue circle shows the difference at 0.5 min exposure time, orange at 2 min of exposure, gray at 10 min of exposure, yellow at 30 min of exposure and dark blue at 60 min of exposure). Framed blue peptides represent the peptides whose magnitude of the difference was statistically significant in Wald tests, with a significance threshold set to 0.01 (MEMHDX software). **b** Relative fractional uptake plot of the difference in Rtt106p-M and Bcd1p<sub>FL</sub>:Rtt106p-M HDX experiments. Each point represents the relative fractional uptake of each Rtt106p-M peptide identified from Bcd1p<sub>FL</sub>:Rtt106p-M state subtracted from the relative fractional uptake of Rtt106p-M peptides from Rtt106p-M free state (the color code is the same as in a).

—●— Bcd1p —●— Bcd1p\_Rtt106p(65-320)

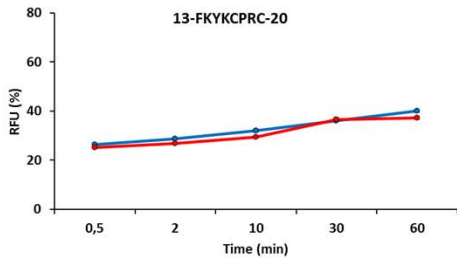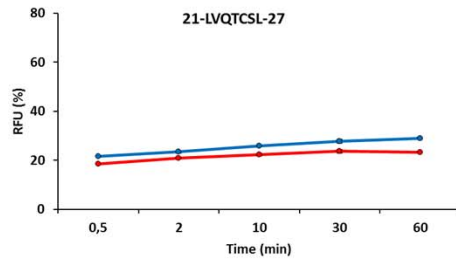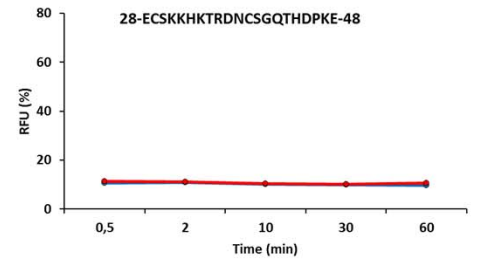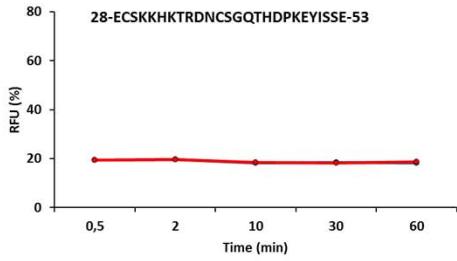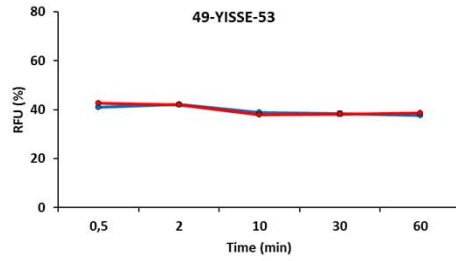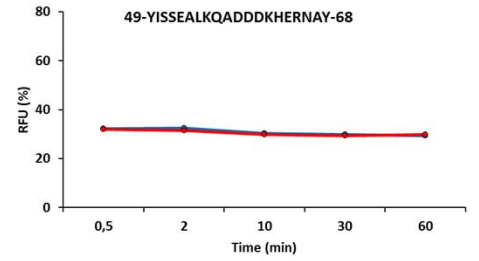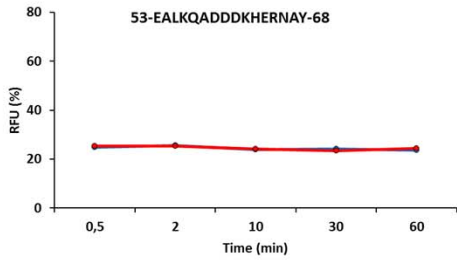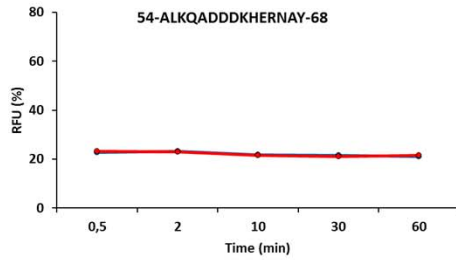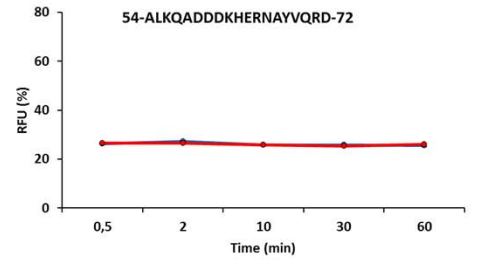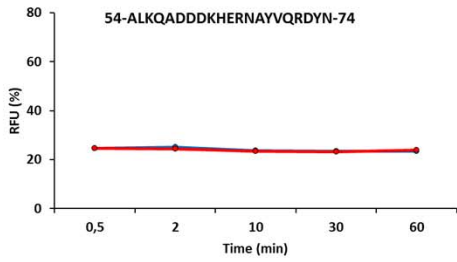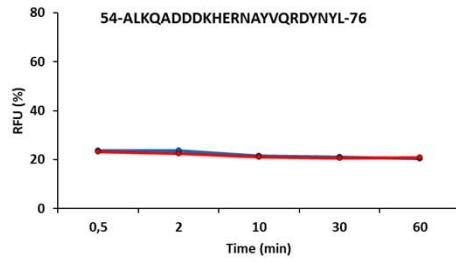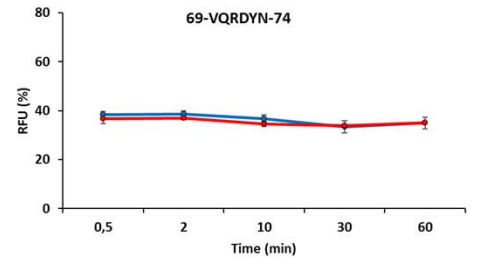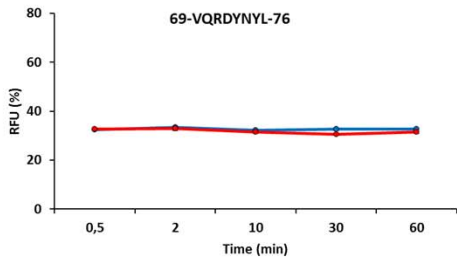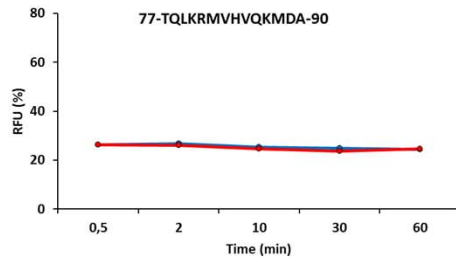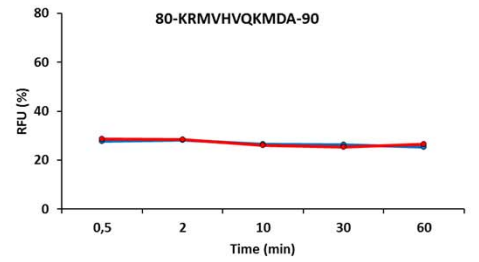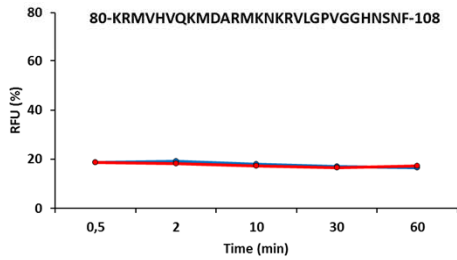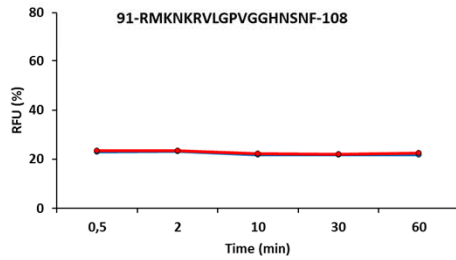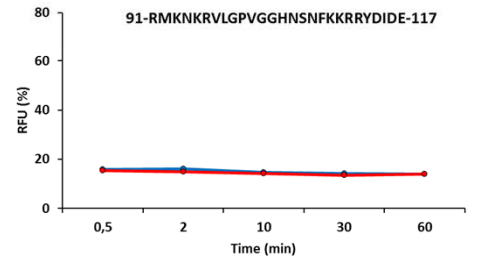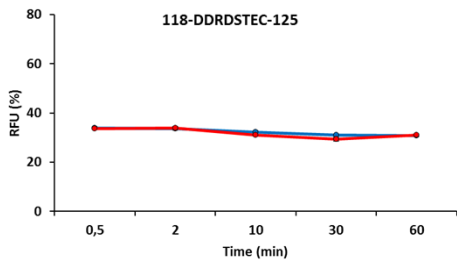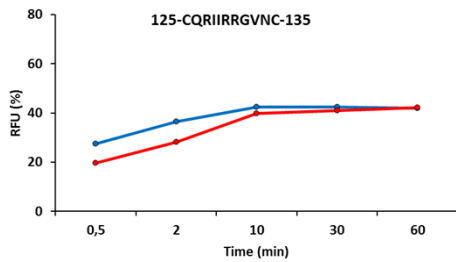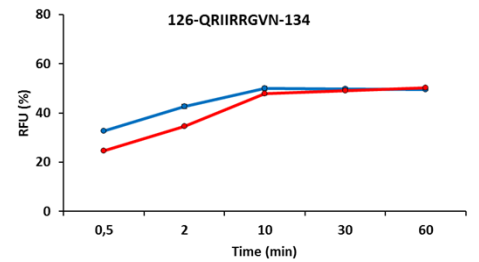

**Bcd1p**      **Bcd1p\_Rtt106p(65-320)**

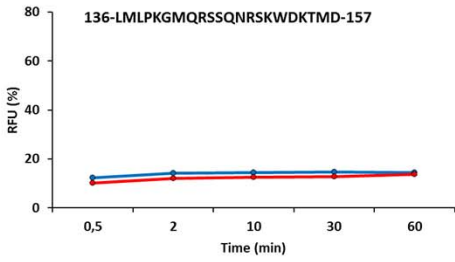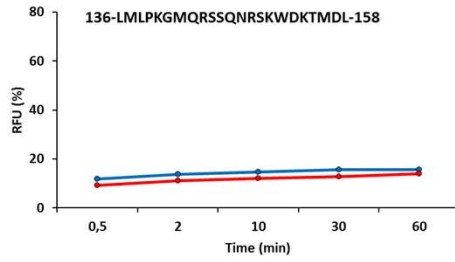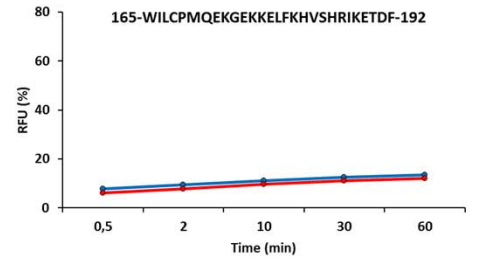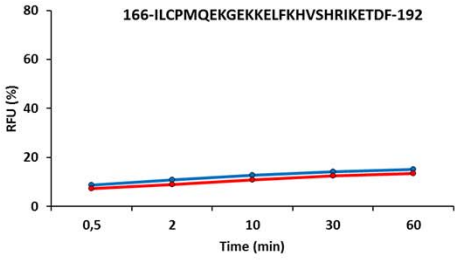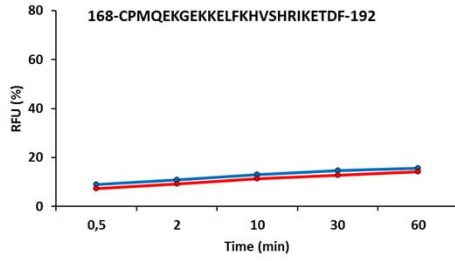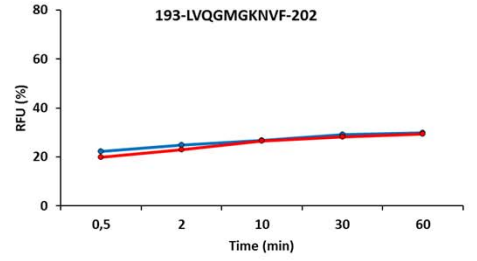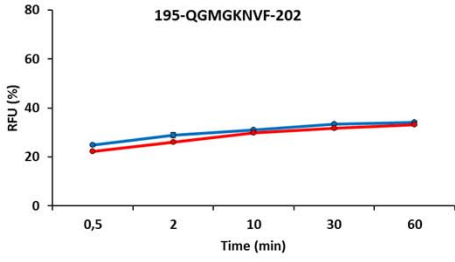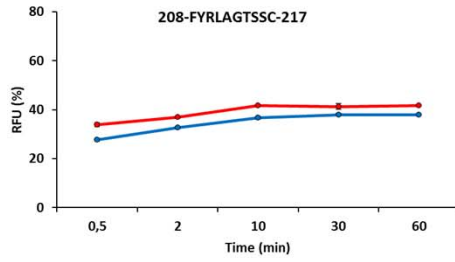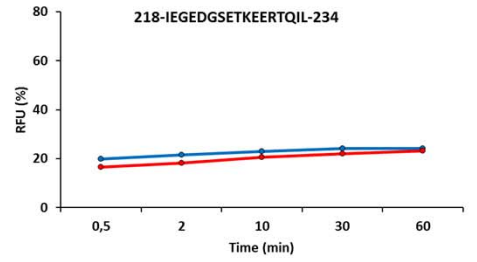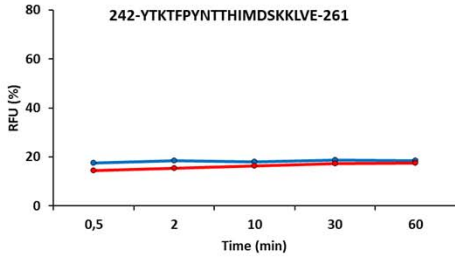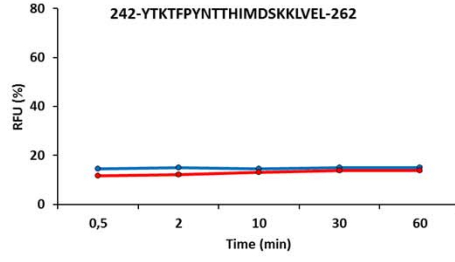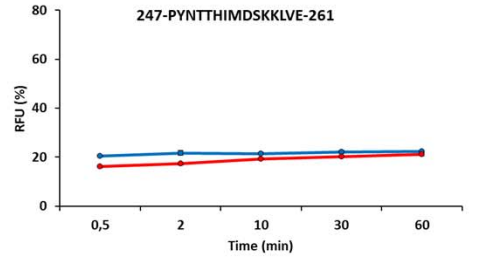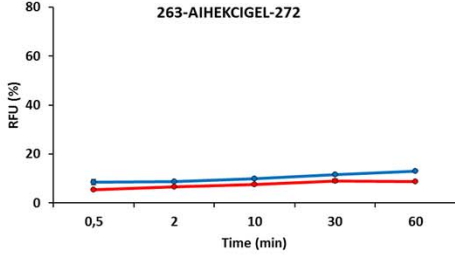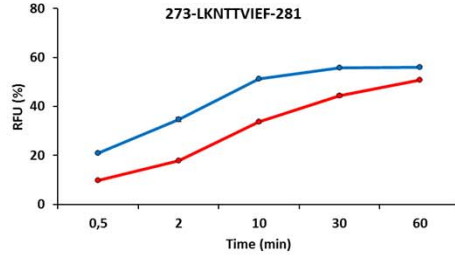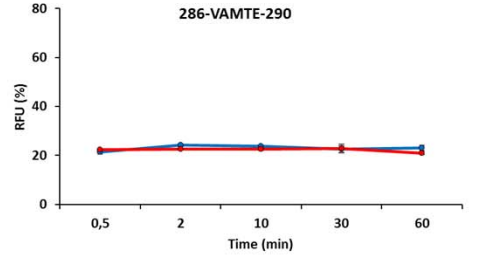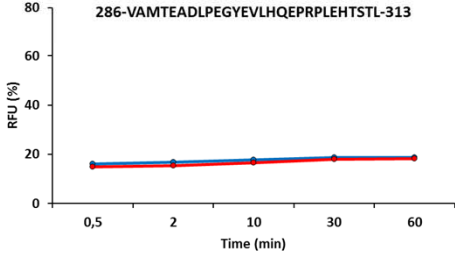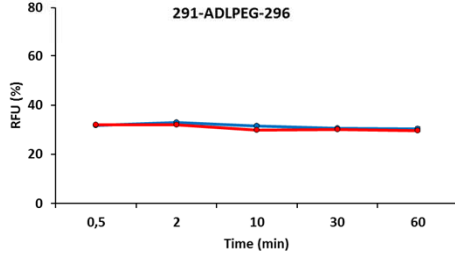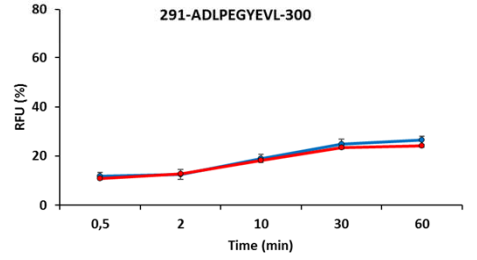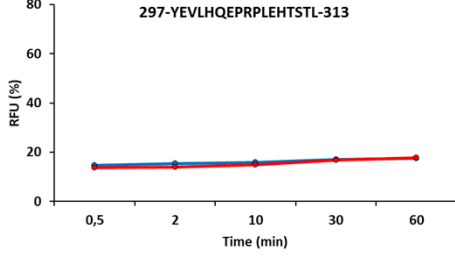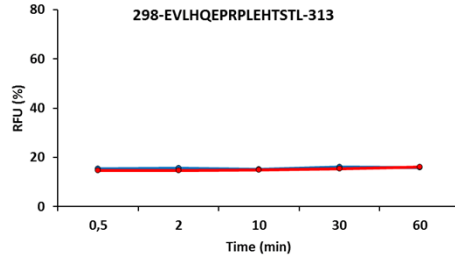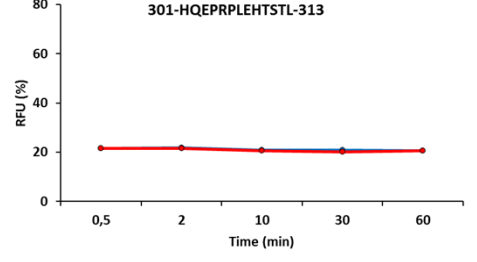

—●— Bcd1p —●— Bcd1p\_Rtt106p(65-320)

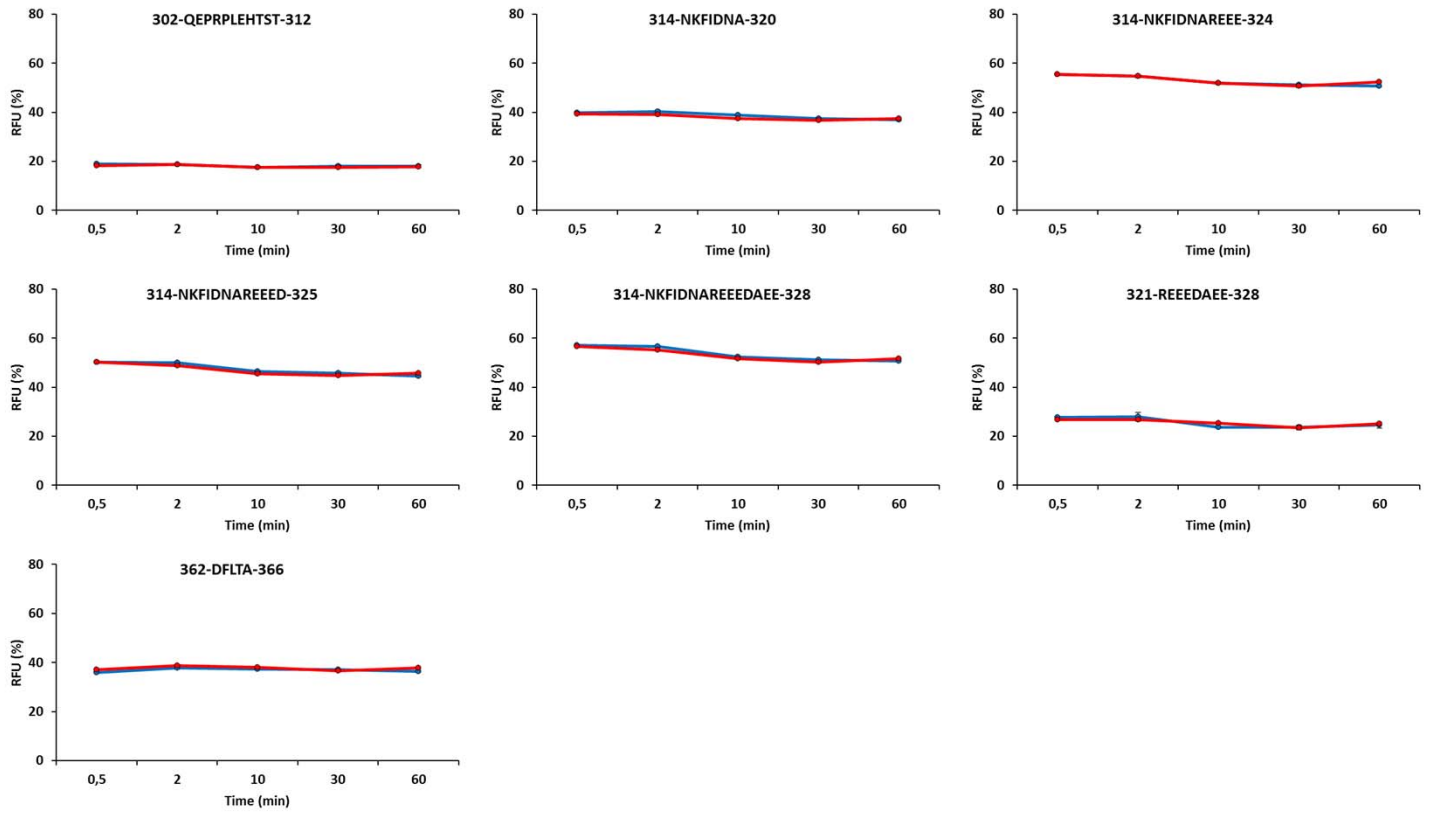

**Fig. 11 HDX uptake plots of all identified and validated peptides of Bcd1p<sub>FL</sub> in Bcd1p<sub>FL</sub> alone (blue curve) and Bcd1p<sub>FL</sub>:Rtt106p-M (red curve) states.**

● Rtt106p(65-320)    
 ● Rtt106p(65-320)\_Bcd1p

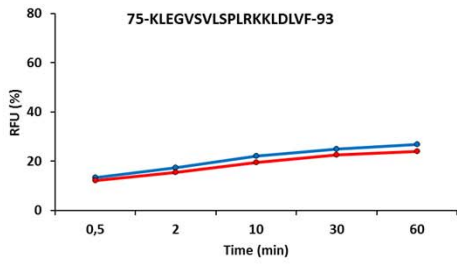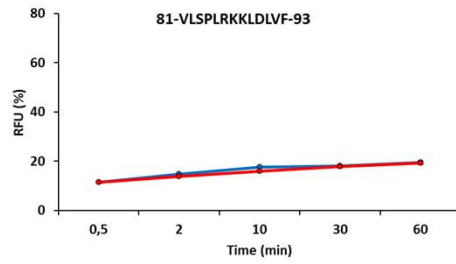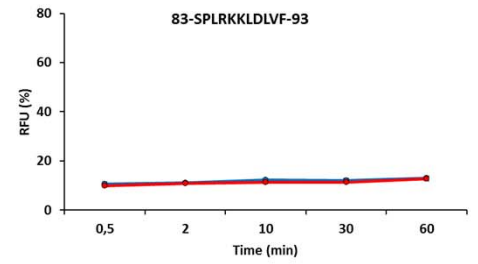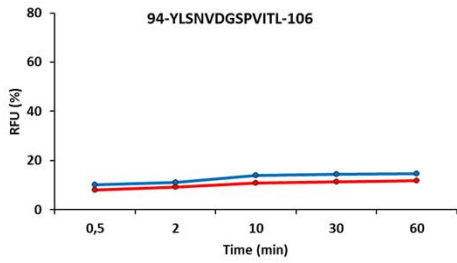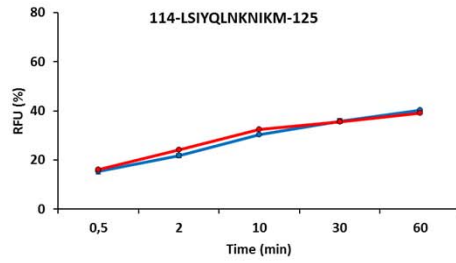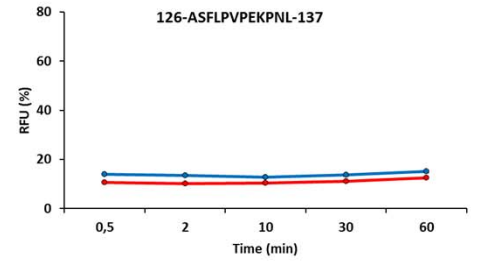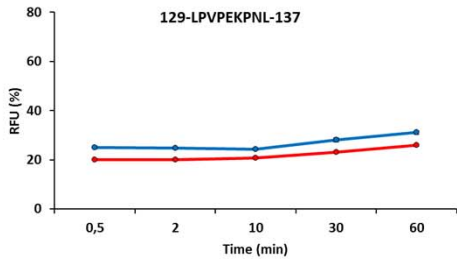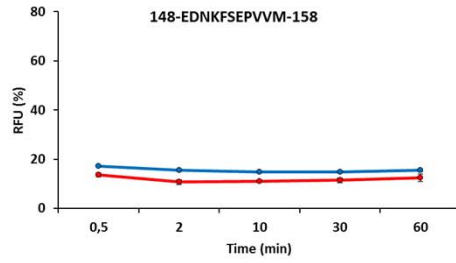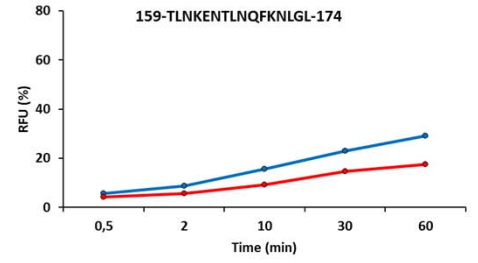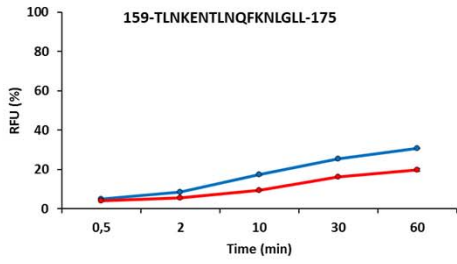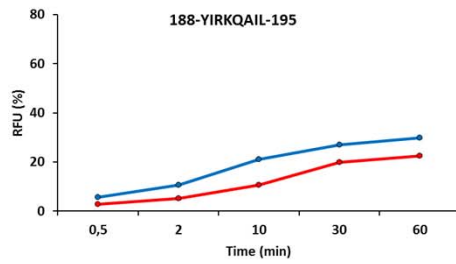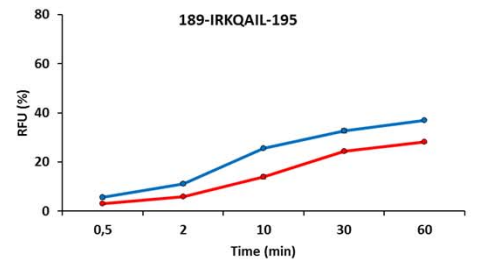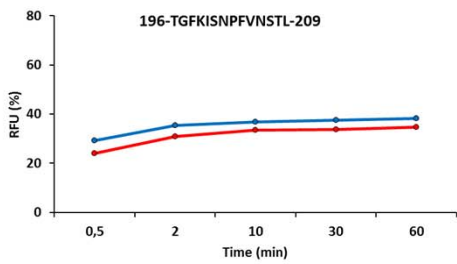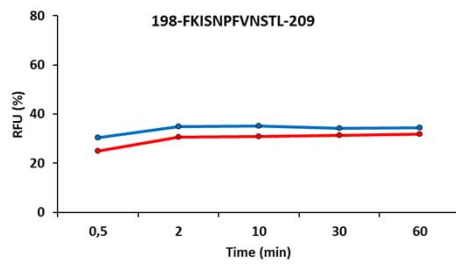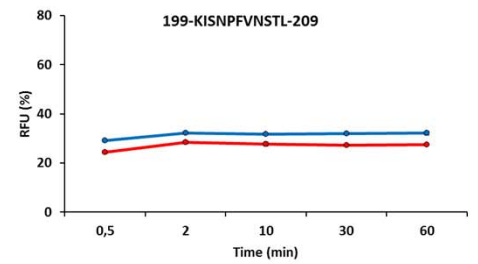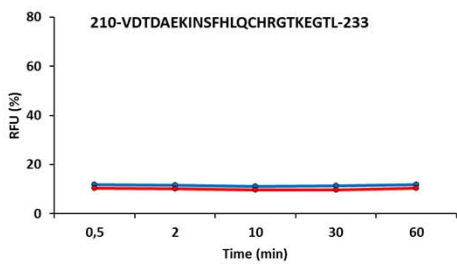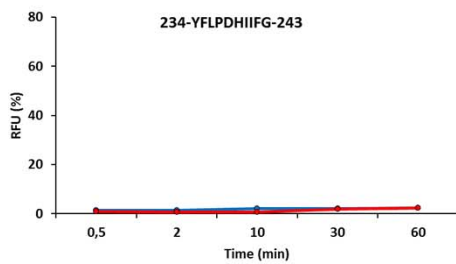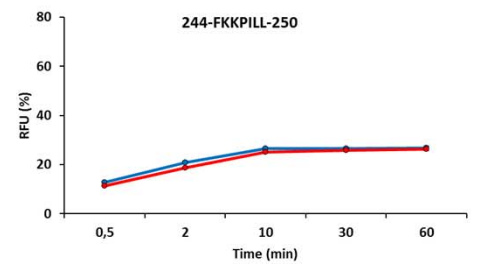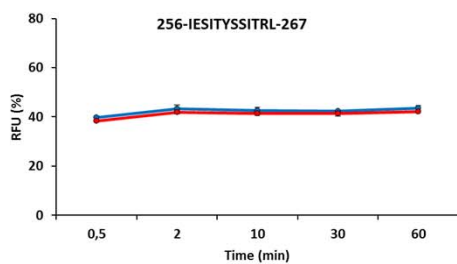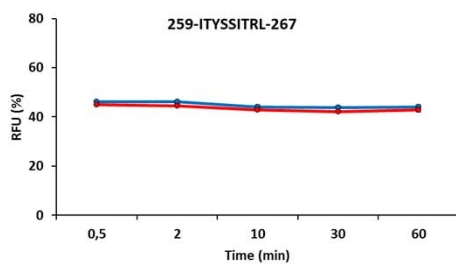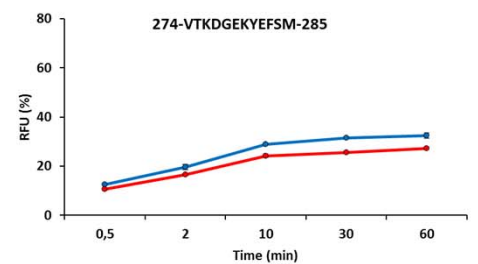

**Fig. 12 HDX uptake plots of all identified and validated peptides of Rtt106p-M in Rtt106p-M alone (blue curve) and Bcd1p<sub>FL</sub>:Rtt106p-M (red curve) states.**

**a**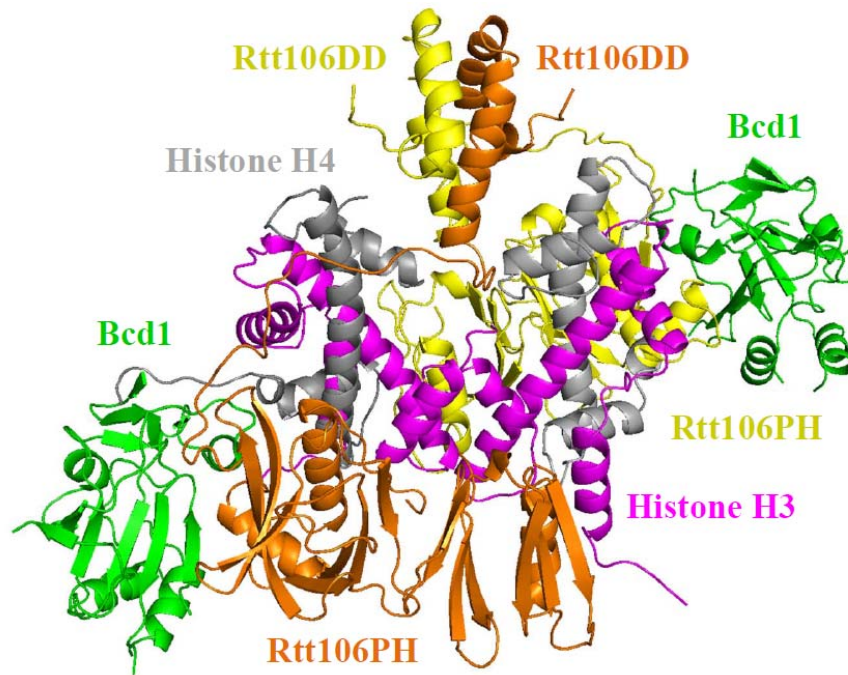**b**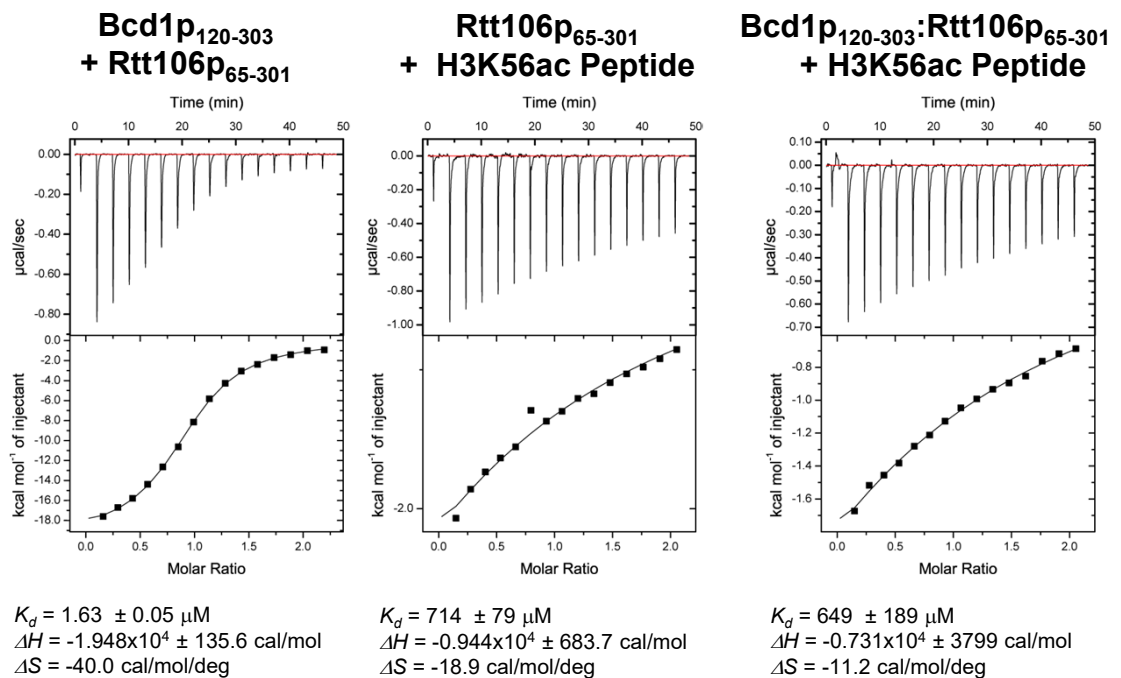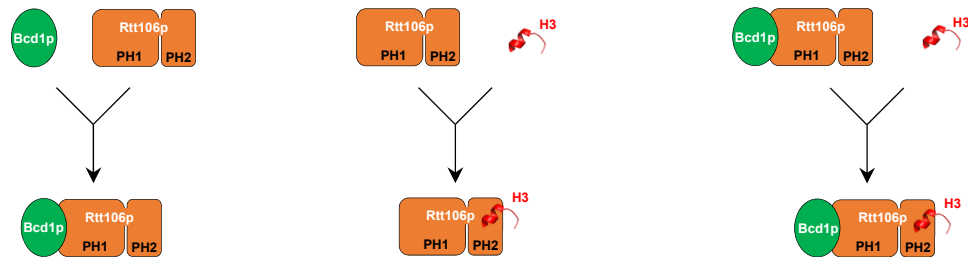

**Fig. 13 a** Structural model of the heterodimer Bcd1p:Rtt106p in complex with the (H3:H4)<sub>2</sub> tetramer. The model was built on the basis of the 3D model of the complex Rtt106p:(H3:H4)<sub>2</sub><sup>13</sup> and the present crystal structure of Bcd1p<sub>120-303</sub>:Rtt106p<sub>65-301</sub> (our work). **b** Interaction analysis between Rtt106p<sub>65-301</sub> and H3K56ac peptide with or without Bcd1p<sub>120-303</sub>. From the left to the right: ITC results between Rtt106p<sub>65-301</sub> and Bcd1p<sub>120-303</sub> (control), Rtt106p<sub>65-301</sub> and H3K56ac peptide and between the Bcd1p<sub>120-303</sub>:Rtt106p<sub>65-301</sub> complex and H3K56ac peptide. These experiments were recorded at 293 K in buffer containing 10 mM NaPi at pH 7.5, 150 mM NaCl and 0.5 mM TCEP. The calculated affinities and thermodynamic parameters are indicated. Schematic representations of the experiments are shown at the bottom of each experiment.

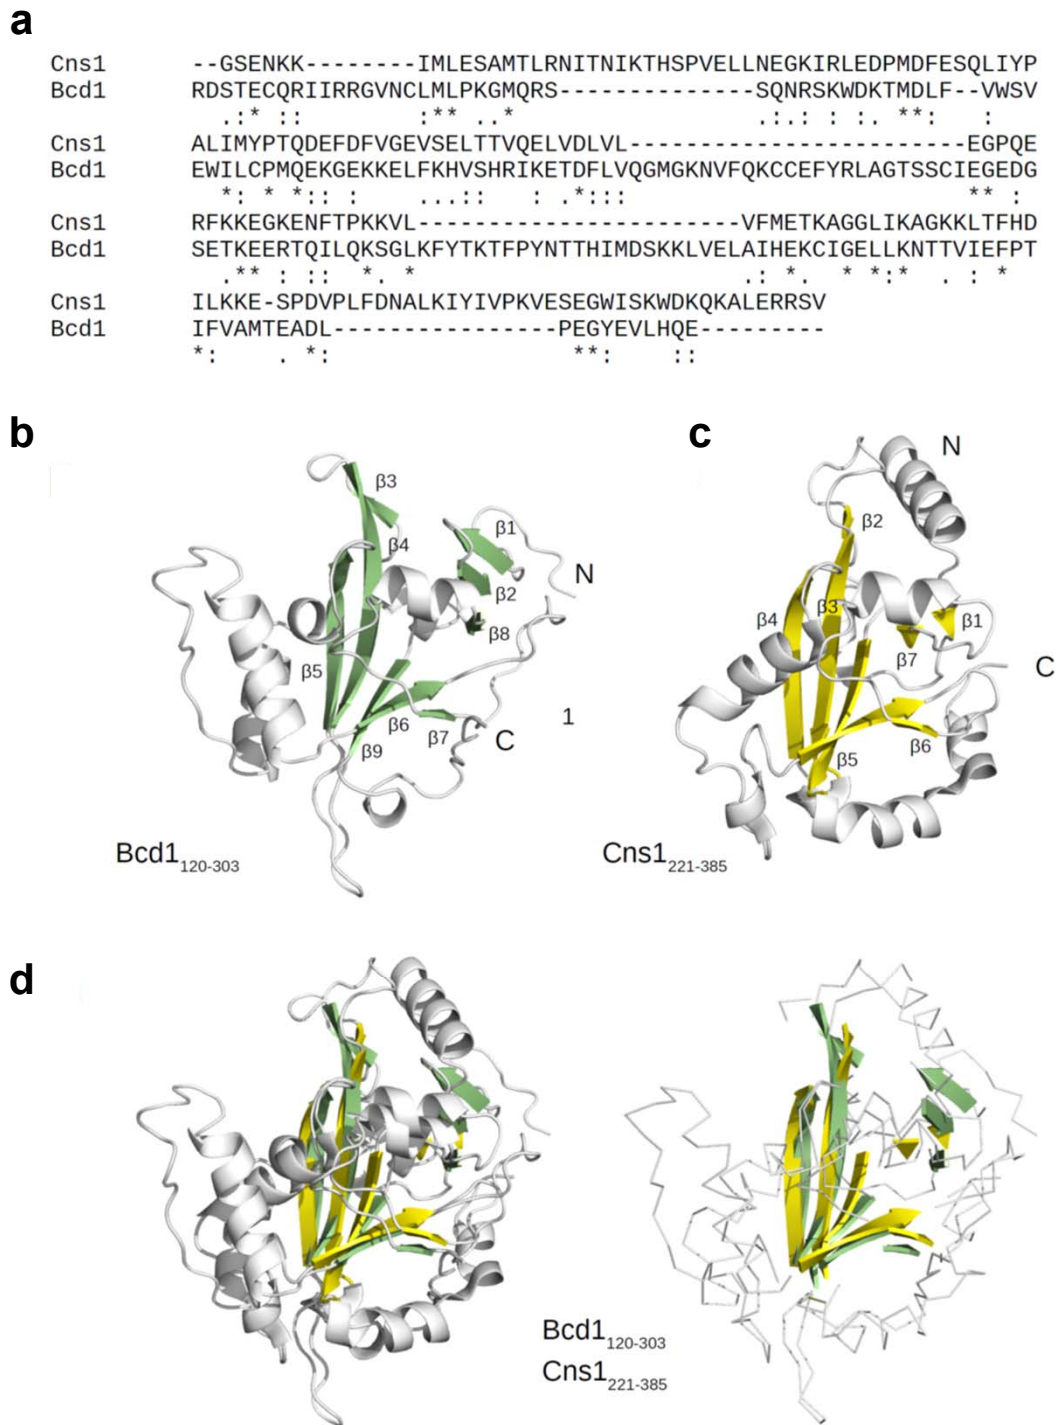

**Fig. 14 Structural comparison of the wheel domains from Bcd1p and Cns1p.** **a** Sequence alignment of Bcd1p<sub>120-303</sub> and Cns1p<sub>221-385</sub>. Perfect matches, strongly similar and weakly similar residues are respectively indicated with an asterisk, a double dot and a dot. **b** Cartoon representation of the best NMR structure of Bcd1p<sub>120-130</sub> (entry PDB code 6NZ2 [<https://www.rcsb.org/structure/6NZ2>]). **c** Cartoon representation of the X-ray structure of Cns1p<sub>221-385</sub> (entry PDB code 6HFM [<https://www.rcsb.org/structure/6HFM>]). **d** 3D superimposition of Bcd1p<sub>120-303</sub> and Cns1p<sub>221-385</sub>. On the right, structures are shown in cartoon mode. For more clarity, loops and helices in Bcd1p and Cns1p are shown in ribbon mode (on the left), whereas  $\beta$ -strands are displayed in cartoon mode.



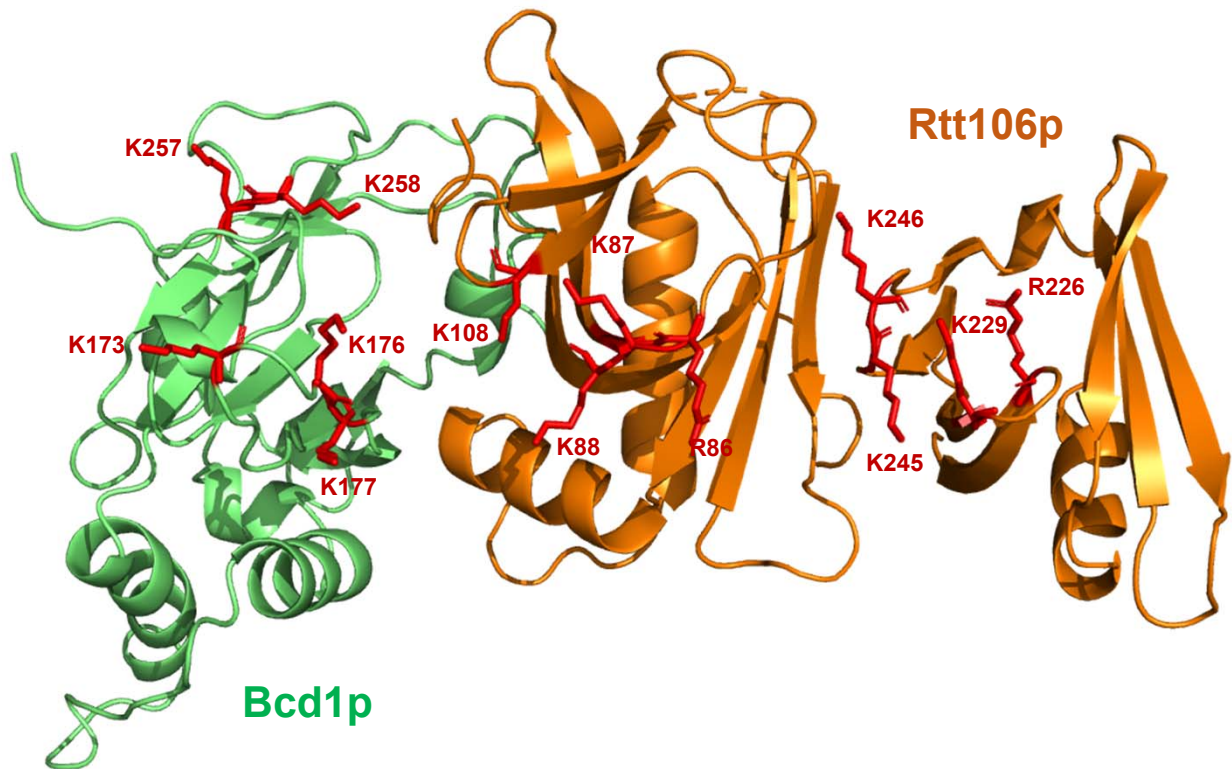

**Fig. 15** The binding site for dsDNA at the surface of Rtt106p in the Rtt106p<sub>65-301</sub>:Bcd1p<sub>120-303</sub> complex (entry PDB code 6THL [<https://www.rcsb.org/structure/6THL>]). Several conserved positively charged residues (in red) at the surface of Rtt106p form a positively charged ridge region that is responsible for dsDNA binding<sup>14</sup>. This positive patch continues on the Bcd1p molecular surface.

## Supplementary Tables

**Supplementary Table 1. Mass spectrometry analysis of gel bands from SDS-PAGE**

| <b>Band</b> | <b>Protein</b>      | <b>Sequence coverage</b> | <b>Number of unique peptides</b> | <b>Spectral count</b> |
|-------------|---------------------|--------------------------|----------------------------------|-----------------------|
| 1A          | Bcd1_FL             | 78                       | 52                               | 2710                  |
|             | His-Rtt106_(65-320) | 51                       | 13                               | 50                    |
| 1B          | His-Rtt106_(65-320) | 83                       | 52                               | 3667                  |
|             | Bcd1_FL             | 55                       | 31                               | 158                   |
| 1C          | His_Bcd1_FL         | 68                       | 52                               | 2683                  |
|             | Rtt106_(65-320)     | 84                       | 21                               | 143                   |
| 1D          | Rtt106_(65-320)     | 97                       | 57                               | 4036                  |
|             | His_Bcd1_FL         | 54                       | 35                               | 178                   |
| 1E          | Bcd1_FL             | 69                       | 43                               | 1408                  |
|             | His-Rtt106_FL       | 64                       | 31                               | 46                    |
| 1F          | His-Rtt106_FL       | 71                       | 65                               | 560                   |
|             | Bcd1_FL             | 55                       | 24                               | 102                   |
| 1G          | His_Bcd1_FL         | 67                       | 54                               | 2524                  |
|             | Rtt106_FL           | 74                       | 56                               | 939                   |
| 1H          | Rtt106_FL           | 78                       | 68                               | 3465                  |
|             | His_Bcd1_FL         | 49                       | 33                               | 386                   |

Supplementary Table 2. Results of the cross-linking experiments for the complex Bcd1p<sub>FL</sub>:Rtt106p-M

| Replicate | Ratio | Heavy/<br>Light | Cross-linked<br>proteins | Cross-linked<br>sites | Peptide 1                                      | Peptide 2                                     | m/z     | Charge | M+H+     | Calculated<br>Mass | Deviation<br>(ppm) | Retention<br>time (sec) |
|-----------|-------|-----------------|--------------------------|-----------------------|------------------------------------------------|-----------------------------------------------|---------|--------|----------|--------------------|--------------------|-------------------------|
| 1         | 1:50  | H               | Bcd1p-Bcd1p              | K16-K88               | <sup>15</sup> [YKBPR] <sup>19</sup>            | <sup>82</sup> [MVHVQKMDAR] <sup>91</sup>      | 693,692 | 3      | 2079,062 | 2079,059           | 1,5                | 1144,49                 |
|           | 1:50  | L               | Bcd1p-Bcd1p              | K16-K88               | <sup>15</sup> [YKBPR] <sup>19</sup>            | <sup>82</sup> [MVHVQKMDAR] <sup>91</sup>      | 692,349 | 3      | 2075,033 | 2075,034           | -0,7               | 1151,10                 |
|           | 1:50  | H               | Bcd1p-Bcd1p              | K16-S106              | <sup>15</sup> [YKBPR] <sup>19</sup>            | <sup>97</sup> [VLGPVGGHNSNFK] <sup>109</sup>  | 548,291 | 4      | 2190,145 | 2190,142           | 1,3                | 1301,30                 |
|           | 1:50  | L               | Bcd1p-Bcd1p              | K16-S106              | <sup>15</sup> [YKBPR] <sup>19</sup>            | <sup>97</sup> [VLGPVGGHNSNFK] <sup>109</sup>  | 729,377 | 3      | 2186,117 | 2186,117           | -0,2               | 1310,32                 |
|           | 1:50  | H               | Bcd1p-Bcd1p              | K16-K258              | <sup>15</sup> [YKBPR] <sup>19</sup>            | <sup>258</sup> [KLVELAIHEK] <sup>267</sup>    | 682,059 | 3      | 2044,164 | 2044,156           | 4,1                | 1674,91                 |
|           | 1:50  | L               | Bcd1p-Bcd1p              | K16-K258              | <sup>15</sup> [YKBPR] <sup>19</sup>            | <sup>258</sup> [KLVELAIHEK] <sup>267</sup>    | 408,832 | 5      | 2040,131 | 2040,131           | 0,4                | 1678,35                 |
|           | 1:50  | H               | Bcd1p-Bcd1p              | K80-K151              | <sup>150</sup> [SKWVK] <sup>154</sup>          | <sup>72</sup> [DYNLTQLKR] <sup>81</sup>       | 706,710 | 3      | 2118,116 | 2118,116           | -0,3               | 2538,07                 |
|           | 1:50  | L               | Bcd1p-Bcd1p              | K80-K151              | <sup>150</sup> [SKWVK] <sup>154</sup>          | <sup>72</sup> [DYNLTQLKR] <sup>81</sup>       | 705,368 | 3      | 2114,089 | 2114,091           | -1,0               | 2550,45                 |
|           | 1:50  | H               | Bcd1p-Bcd1p              | K87-K151              | <sup>150</sup> [SKWVK] <sup>154</sup>          | <sup>82</sup> [MVHVQKMDAR] <sup>91</sup>      | 673,685 | 3      | 2019,043 | 2019,045           | -1,0               | 1500,29                 |
|           | 1:50  | L               | Bcd1p-Bcd1p              | K87-K151              | <sup>150</sup> [SKWVK] <sup>154</sup>          | <sup>82</sup> [MVHVQKMDAR] <sup>91</sup>      | 672,344 | 3      | 2015,019 | 2015,020           | -0,1               | 1507,08                 |
|           | 1:50  | H               | Bcd1p-Bcd1p              | K140-K151             | <sup>150</sup> [SKWVK] <sup>154</sup>          | <sup>132</sup> [GVNBLMLPKGMQR] <sup>144</sup> | 770,068 | 3      | 2308,188 | 2308,191           | -1,0               | 2422,19                 |
|           | 1:50  | L               | Bcd1p-Bcd1p              | K140-K151             | <sup>150</sup> [SKWVK] <sup>154</sup>          | <sup>132</sup> [GVNBLMLPKGMQR] <sup>144</sup> | 768,727 | 3      | 2304,165 | 2304,166           | -0,5               | 2433,80                 |
|           | 1:50  | H               | Bcd1p-Bcd1p              | K151-K188             | <sup>150</sup> [SKWVK] <sup>154</sup>          | <sup>187</sup> [IKETDFLVQGMGK] <sup>199</sup> | 568,308 | 4      | 2270,209 | 2270,204           | 2,4                | 2496,24                 |
|           | 1:50  | L               | Bcd1p-Bcd1p              | K151-K188             | <sup>150</sup> [SKWVK] <sup>154</sup>          | <sup>187</sup> [IKETDFLVQGMGK] <sup>199</sup> | 756,064 | 3      | 2266,177 | 2266,178           | -0,3               | 2509,23                 |
|           | 1:50  | H               | Rtt106p-Bcd1p            | S177-K151             | <sup>171</sup> [NLGLLDSNVTDFEK] <sup>184</sup> | <sup>150</sup> [SKWVK] <sup>154</sup>         | 790,411 | 3      | 2369,218 | 2369,217           | 0,2                | 3028,83                 |
|           | 1:50  | L               | Rtt106p-Bcd1p            | S177-K151             | <sup>171</sup> [NLGLLDSNVTDFEK] <sup>184</sup> | <sup>150</sup> [SKWVK] <sup>154</sup>         | 789,070 | 3      | 2365,194 | 2365,192           | 0,9                | 3038,08                 |
|           | 1:100 | H               | Bcd1p-Bcd1p              | K16-K62               | <sup>15</sup> [YKBPR] <sup>19</sup>            | <sup>57</sup> [QADDDKHER] <sup>65</sup>       | 659,984 | 3      | 1977,937 | 1977,939           | -0,9               | 556,97                  |
|           | 1:100 | L               | Bcd1p-Bcd1p              | K16-K62               | <sup>15</sup> [YKBPR] <sup>19</sup>            | <sup>57</sup> [QADDDKHER] <sup>65</sup>       | 658,643 | 3      | 1973,913 | 1973,913           | -0,1               | 560,22                  |
|           | 1:100 | H               | Bcd1p-Bcd1p              | K16-K88               | <sup>15</sup> [YKBPR] <sup>19</sup>            | <sup>82</sup> [MVHVQKMDAR] <sup>91</sup>      | 693,692 | 3      | 2079,061 | 2079,060           | 0,5                | 1139,98                 |
|           | 1:100 | L               | Bcd1p-Bcd1p              | K16-K88               | <sup>15</sup> [YKBPR] <sup>19</sup>            | <sup>82</sup> [MVHVQKMDAR] <sup>91</sup>      | 692,350 | 3      | 2075,034 | 2075,034           | 0,1                | 1147,61                 |
|           | 1:100 | H               | Bcd1p-Bcd1p              | K16-K151              | <sup>15</sup> [YKBPR] <sup>19</sup>            | <sup>150</sup> [SKWVK] <sup>154</sup>         | 509,937 | 3      | 1527,796 | 1527,793           | 2,3                | 966,86                  |
|           | 1:100 | L               | Bcd1p-Bcd1p              | K16-K151              | <sup>15</sup> [YKBPR] <sup>19</sup>            | <sup>150</sup> [SKWVK] <sup>154</sup>         | 508,594 | 3      | 1523,768 | 1523,768           | 0,6                | 968,52                  |
|           | 1:100 | H               | Bcd1p-Bcd1p              | K16-K258              | <sup>15</sup> [YKBPR] <sup>19</sup>            | <sup>258</sup> [KLVELAIHEK] <sup>267</sup>    | 409,637 | 5      | 2044,158 | 2044,156           | 1,1                | 1649,36                 |
|           | 1:100 | L               | Bcd1p-Bcd1p              | K16-K258              | <sup>15</sup> [YKBPR] <sup>19</sup>            | <sup>258</sup> [KLVELAIHEK] <sup>267</sup>    | 408,832 | 5      | 2040,132 | 2040,131           | 0,6                | 1657,68                 |
|           | 1:100 | H               | Bcd1p-Bcd1p              | K62-T77/K80           | <sup>57</sup> [QADDDKHER] <sup>65</sup>        | <sup>72</sup> [DYNLTQLKR] <sup>81</sup>       | 856,759 | 3      | 2568,262 | 2568,263           | -0,2               | 1876,36                 |
|           | 1:100 | L               | Bcd1p-Bcd1p              | K62-T77/K80           | <sup>57</sup> [QADDDKHER] <sup>65</sup>        | <sup>72</sup> [DYNLTQLKR] <sup>81</sup>       | 855,417 | 3      | 2564,236 | 2564,238           | -0,8               | 1893,61                 |
|           | 1:100 | H               | Bcd1p-Bcd1p              | K151-K188             | <sup>150</sup> [SKWVK] <sup>154</sup>          | <sup>187</sup> [IKETDFLVQGMGK] <sup>199</sup> | 762,737 | 3      | 2286,198 | 2286,199           | -0,5               | 2159,75                 |
|           | 1:100 | L               | Bcd1p-Bcd1p              | K151-K188             | <sup>150</sup> [SKWVK] <sup>154</sup>          | <sup>187</sup> [IKETDFLVQGMGK] <sup>199</sup> | 761,396 | 3      | 2282,174 | 2282,174           | 0,4                | 2174,69                 |
|           | 1:100 | H               | Rtt106p-Bcd1p            | S177-K151             | <sup>171</sup> [NLGLLDSNVTDFEK] <sup>184</sup> | <sup>150</sup> [SKWVK] <sup>154</sup>         | 790,410 | 3      | 2369,217 | 2369,217           | -0,2               | 3035,31                 |
|           | 1:100 | L               | Rtt106p-Bcd1p            | S177-K151             | <sup>171</sup> [NLGLLDSNVTDFEK] <sup>184</sup> | <sup>150</sup> [SKWVK] <sup>154</sup>         | 789,069 | 3      | 2365,193 | 2365,192           | 0,5                | 3046,35                 |
|           | 1:50  | H               | Bcd1p-Bcd1p              | K16-K88               | <sup>15</sup> [YKBPR] <sup>19</sup>            | <sup>82</sup> [MVHVQKMDAR] <sup>91</sup>      | 699,023 | 3      | 2095,055 | 2095,055           | -0,01              | 915,29                  |
|           | 1:50  | L               | Bcd1p-Bcd1p              | K16-K88               | <sup>15</sup> [YKBPR] <sup>19</sup>            | <sup>82</sup> [MVHVQKMDAR] <sup>91</sup>      | 697,681 | 3      | 2091,029 | 2091,030           | -0,1               | 920,91                  |
|           | 1:50  | H               | Bcd1p-Bcd1p              | K16-S106              | <sup>15</sup> [YKBPR] <sup>19</sup>            | <sup>97</sup> [VLGPVGGHNSNFK] <sup>109</sup>  | 548,292 | 4      | 2190,146 | 2190,143           | 1,4                | 1207,99                 |
|           | 1:50  | L               | Bcd1p-Bcd1p              | K16-S106              | <sup>15</sup> [YKBPR] <sup>19</sup>            | <sup>97</sup> [VLGPVGGHNSNFK] <sup>109</sup>  | 547,285 | 4      | 2186,120 | 2186,118           | 0,9                | 1217,83                 |
|           | 1:50  | H               | Bcd1p-Bcd1p              | K16-K258              | <sup>15</sup> [YKBPR] <sup>19</sup>            | <sup>258</sup> [KLVELAIHEK] <sup>267</sup>    | 409,637 | 5      | 2044,157 | 2044,156           | 0,4                | 1549,04                 |
|           | 1:50  | L               | Bcd1p-Bcd1p              | K16-K258              | <sup>15</sup> [YKBPR] <sup>19</sup>            | <sup>258</sup> [KLVELAIHEK] <sup>267</sup>    | 408,832 | 5      | 2040,131 | 2040,131           | 0,1                | 1554,43                 |
|           | 1:50  | H               | Bcd1p-Bcd1p              | K80-K151              | <sup>150</sup> [SKWVK] <sup>154</sup>          | <sup>72</sup> [DYNLTQLKR] <sup>81</sup>       | 706,711 | 3      | 2118,118 | 2118,117           | 0,5                | 2442,31                 |
|           | 1:50  | L               | Bcd1p-Bcd1p              | K80-K151              | <sup>150</sup> [SKWVK] <sup>154</sup>          | <sup>72</sup> [DYNLTQLKR] <sup>81</sup>       | 705,369 | 3      | 2114,093 | 2114,092           | 0,7                | 2454,23                 |
|           | 1:50  | H               | Bcd1p-Bcd1p              | K87-K151              | <sup>150</sup> [SKWVK] <sup>154</sup>          | <sup>82</sup> [MVHVQKMDAR] <sup>91</sup>      | 673,687 | 3      | 2019,045 | 2019,045           | 0,01               | 1399,26                 |
|           | 1:50  | L               | Bcd1p-Bcd1p              | K87-K151              | <sup>150</sup> [SKWVK] <sup>154</sup>          | <sup>82</sup> [MVHVQKMDAR] <sup>91</sup>      | 672,346 | 3      | 2015,023 | 2015,020           | 1,3                | 1406,37                 |
|           | 1:50  | H               | Bcd1p-Bcd1p              | K140-K151             | <sup>150</sup> [SKWVK] <sup>154</sup>          | <sup>132</sup> [GVNBLMLPKGMQR] <sup>144</sup> | 577,806 | 4      | 2308,201 | 2308,191           | 4,2                | 2285,52                 |
|           | 1:50  | L               | Bcd1p-Bcd1p              | K140-K151             | <sup>150</sup> [SKWVK] <sup>154</sup>          | <sup>132</sup> [GVNBLMLPKGMQR] <sup>144</sup> | 576,799 | 4      | 2304,172 | 2304,166           | 2,7                | 2297,39                 |
|           | 1:50  | H               | Bcd1p-Bcd1p              | K151-K188             | <sup>150</sup> [SKWVK] <sup>154</sup>          | <sup>187</sup> [IKETDFLVQGMGK] <sup>199</sup> | 757,406 | 3      | 2270,203 | 2270,204           | -0,3               | 2422,43                 |
|           | 1:50  | L               | Bcd1p-Bcd1p              | K151-K188             | <sup>150</sup> [SKWVK] <sup>154</sup>          | <sup>187</sup> [IKETDFLVQGMGK] <sup>199</sup> | 756,063 | 3      | 2266,174 | 2266,179           | -2,1               | 2439,90                 |
|           | 1:50  | H               | Rtt106p-Bcd1p            | S177-K151             | <sup>171</sup> [NLGLLDSNVTDFEK] <sup>184</sup> | <sup>150</sup> [SKWVK] <sup>154</sup>         | 790,412 | 3      | 2369,221 | 2369,217           | 1,4                | 2894,23                 |
|           | 1:50  | L               | Rtt106p-Bcd1p            | S177-K151             | <sup>171</sup> [NLGLLDSNVTDFEK] <sup>184</sup> | <sup>150</sup> [SKWVK] <sup>154</sup>         | 789,069 | 3      | 2365,193 | 2365,192           | 0,4                | 2903,69                 |
|           | 1:100 | H               | Bcd1p-Bcd1p              | K16-K62               | <sup>15</sup> [YKBPR] <sup>19</sup>            | <sup>57</sup> [QADDDKHER] <sup>65</sup>       | 659,984 | 3      | 1977,939 | 1977,939           | 0,03               | 401,83                  |
|           | 1:100 | L               | Bcd1p-Bcd1p              | K16-K62               | <sup>15</sup> [YKBPR] <sup>19</sup>            | <sup>57</sup> [QADDDKHER] <sup>65</sup>       | 494,234 | 4      | 1973,914 | 1973,913           | 0,5                | 401,76                  |
|           | 1:100 | H               | Bcd1p-Bcd1p              | K16-K88               | <sup>15</sup> [YKBPR] <sup>19</sup>            | <sup>82</sup> [MVHVQKMDAR] <sup>91</sup>      | 699,023 | 3      | 2095,054 | 2095,055           | -0,4               | 839,91                  |
|           | 1:100 | L               | Bcd1p-Bcd1p              | K16-K88               | <sup>15</sup> [YKBPR] <sup>19</sup>            | <sup>82</sup> [MVHVQKMDAR] <sup>91</sup>      | 697,681 | 3      | 2091,028 | 2091,030           | -1,0               | 930,05                  |
|           | 1:100 | H               | Bcd1p-Bcd1p              | K16-K151              | <sup>15</sup> [YKBPR] <sup>19</sup>            | <sup>150</sup> [SKWVK] <sup>154</sup>         | 382,703 | 4      | 1527,792 | 1527,793           | -0,7               | 914,83                  |
|           | 1:100 | L               | Bcd1p-Bcd1p              | K16-K151              | <sup>15</sup> [YKBPR] <sup>19</sup>            | <sup>150</sup> [SKWVK] <sup>154</sup>         | 381,697 | 4      | 1523,767 | 1523,768           | -0,5               | 924,37                  |
|           | 1:100 | H               | Bcd1p-Bcd1p              | K16-K258              | <sup>15</sup> [YKBPR] <sup>19</sup>            | <sup>258</sup> [KLVELAIHEK] <sup>267</sup>    | 682,058 | 3      | 2044,160 | 2044,156           | 2,0                | 1559,56                 |
|           | 1:100 | L               | Bcd1p-Bcd1p              | K16-K258              | <sup>15</sup> [YKBPR] <sup>19</sup>            | <sup>258</sup> [KLVELAIHEK] <sup>267</sup>    | 408,832 | 5      | 2040,133 | 2040,131           | 0,7                | 1565,29                 |
|           | 1:100 | H               | Bcd1p-Bcd1p              | K62-T77/K80           | <sup>57</sup> [QADDDKHER] <sup>65</sup>        | <sup>72</sup> [DYNLTQLKR] <sup>81</sup>       | 856,760 | 3      | 2568,265 | 2568,263           | 0,8                | 1790,24                 |
|           | 1:100 | L               | Bcd1p-Bcd1p              | K62-T77/K80           | <sup>57</sup> [QADDDKHER] <sup>65</sup>        | <sup>72</sup> [DYNLTQLKR] <sup>81</sup>       | 855,417 | 3      | 2564,238 | 2564,238           | 0,1                | 1803,40                 |
|           | 1:100 | H               | Bcd1p-Bcd1p              | K151-K188             | <sup>150</sup> [SKWVK] <sup>154</sup>          | <sup>187</sup> [IKETDFLVQGMGK] <sup>199</sup> | 757,406 | 3      | 2270,205 | 2270,204           | 0,3                | 2376,95                 |
|           | 1:100 | L               | Bcd1p-Bcd1p              | K151-K188             | <sup>150</sup> [SKWVK] <sup>154</sup>          | <sup>187</sup> [IKETDFLVQGMGK] <sup>199</sup> | 756,065 | 3      | 2266,181 | 2266,179           | 0,8                | 2391,04                 |
|           | 1:100 | H               | Rtt106p-Bcd1p            | S177-K151             | <sup>171</sup> [NLGLLDSNVTDFEK] <sup>184</sup> | <sup>150</sup> [SKWVK] <sup>154</sup>         | 790,412 | 3      | 2369,223 | 2369,217           | 2,3                | 2902,24                 |
|           | 1:100 | L               | Rtt106p-Bcd1p            | S177-K151             | <sup>171</sup> [NLGLLDSNVTDFEK] <sup>184</sup> | <sup>150</sup> [SKWVK] <sup>154</sup>         | 789,070 | 3      | 2365,196 | 2365,192           | 1,7                | 2907,60                 |

**Supplementary Table 3. Oligonucleotides used in this study**

| Oligonucleotide                | Sequence                                                                  | Reference  |
|--------------------------------|---------------------------------------------------------------------------|------------|
| U3 -800nts <sup>for</sup>      | AACAGTTGTCCAACAAGTGC                                                      | This study |
| U3 -800nts <sup>rev</sup>      | AATGGCTGAATCCCATAGAC                                                      | This study |
| U3 -400nts <sup>for</sup>      | CCATGGATGGGTAAAGTCAT                                                      | This study |
| U3 -400nts <sup>rev</sup>      | TCAGAATTTGTTCTGCCTGG                                                      | This study |
| U3 prom <sup>for</sup>         | CACATACAGCGCCTTAAGG                                                       | This study |
| U3 prom <sup>rev</sup>         | GAAGTACGTGACACAGAT                                                        | This study |
| U3 intron <sup>for</sup>       | AATATACCCCAAACATTTTACCC                                                   | This study |
| U3 intron <sup>rev</sup>       | TGTAGAATGTGTTAGTCAAAAGCTG                                                 | This study |
| U3 exon 2 <sup>for</sup>       | GAGCCACTGAATCCAAC                                                         | 15         |
| U3 exon 2 <sup>rev</sup>       | GTACATAGGATGGGTCA                                                         | 15         |
| U3 term <sup>for</sup>         | GCTTTGCCGTTGCATTTGT                                                       | This study |
| U3 term <sup>rev</sup>         | CTTACACACCAACTAATCCA                                                      | This study |
| U3 +400nts <sup>for</sup>      | CCTATTGTAGGAATTGTGGC                                                      | This study |
| U3 +400nts <sup>rev</sup>      | CTTTCGTCAATGAAGTGACC                                                      | This study |
| U3 +800nts <sup>for</sup>      | CCATTACAGATCATTGGCTC                                                      | This study |
| U3 +800nts <sup>rev</sup>      | GCGTTGATCACAGTCTGTTT                                                      | This study |
| U14 <sup>for</sup>             | TCACGGTGATGAAAGACTGG                                                      | 15         |
| U14 <sup>rev</sup>             | AAGAGCGGTCACCGAGAGTA                                                      | 15         |
| U14 3'ext <sup>rev</sup>       | GATACTACAGTATACGATCACTC                                                   | 15         |
| snR52 <sup>for</sup>           | TGAATGACATTAGCGTGAACAA                                                    | 15         |
| snR52 <sup>rev</sup>           | TTCAGAAGGAAGGCAACATAAG                                                    | 15         |
| snR54 <sup>for</sup>           | CCGAAAAAGGTGCGAATATG                                                      | 15         |
| snR54 <sup>rev</sup>           | AATGCGCTTTTTAATCATCCA                                                     | 15         |
| snR32 <sup>for</sup>           | TGCAGGGAATGACTAAAAGCC                                                     | 15         |
| snR32 <sup>rev</sup>           | TCAGAAATGATCAACACCAGGC                                                    | 15         |
| Chr.V <sup>for</sup>           | GCAATCAACATCTGAAGAAAAGAAAGTAGT                                            | 15         |
| Chr.V <sup>rev</sup>           | CATAATCTGCGTAAAAATGGCGTAAAT                                               | 15         |
| snR54 <sup>for</sup>           | CCGAAAAAGGTGCGAATATG                                                      | This study |
| snR54 <sup>rev</sup>           | AATGCGCTTTTTAATCATCCA                                                     | This study |
| Alg9 <sup>for</sup>            | TGTCACGGATAGTGGCTTTG                                                      | 16         |
| Alg9 <sup>rev</sup>            | TACCATTACGTCCTCCGTACA                                                     | 16         |
| HTB1 downstream <sup>for</sup> | CGAAACTTCAGAGCATTGGC                                                      | 17         |
| HTB1 downstream <sup>rev</sup> | GGGTTCAATCTCCAAGGCAT                                                      | 17         |
| HTA/B1 prom <sup>for</sup>     | ATAGTTAACGACCCAACCGCGT                                                    | 17         |
| HTA/B1 prom <sup>rev</sup>     | ACGGGCGTTTTCTTCAACAACGA                                                   | 17         |
| HTA1 downstream <sup>for</sup> | AGGTTCAATTGGGCACTGTTG                                                     | 17         |
| HTA1 downstream <sup>rev</sup> | ACAGTTCTCCGTGACAGGAT                                                      | 17         |
| HTA/B2 prom <sup>for</sup>     | AATGGTAGCACGTGCGGTTT                                                      | 17         |
| HTA/B2 prom <sup>rev</sup>     | TGACGGCAAGTGTCTCACTGTT                                                    | 17         |
| HMR a1 <sup>for</sup>          | TGGATGATATTTGTAGTATGGCGGA                                                 | 17         |
| HMR a1 <sup>rev</sup>          | TCCCTTTGGGCTCTTCTCTT                                                      | 17         |
| KanMx <sup>for</sup>           | ATTGACCACACCTCTACCGGGACATGGAGGCCCA<br>GAATACCCTCCTTGACAGTCTTGACGTGCGC     | This study |
| KanMx <sup>rev</sup>           | GCGCACGTCAAGACTGTCAAGGAGGGTATTCTG<br>GGCCTCCATGTCCCCTGAGAGGTGTGGTCAAT     | This study |
| Bcd1 1-115 <sup>for</sup>      | GTGGGCGGCCACAACCTCTAATTTCAAGAAGAGAA<br>GATACGATATATGAGCGAATTTCTTATGATTTAT | This study |
| Bcd1 1-115 <sup>rev</sup>      | CCTAATTATCCTCTGACACTCCGTGCTATCACGAT<br>CATCCTCATCCAGTATAGCGACCAGCATTTC    | This study |

**Supplementary Table 4. Plasmids used in this study**

| <b>Plasmid</b>           | <b>Characteristics</b>                                  | <b>Reference</b> |
|--------------------------|---------------------------------------------------------|------------------|
| <i>S. cerevisiae</i>     |                                                         |                  |
| p416GPD                  | GPD promoter, <i>URA3</i> , Amp <sup>r</sup>            | <sup>18</sup>    |
| p416GPD::FLAG-Bcd1p      | FLAG-Bcd1p                                              | This study       |
| p413TEF                  | TEF promoter, <i>HIS3</i> , Amp <sup>r</sup>            | <sup>18</sup>    |
| p413TEF::FLAG-Rtt106p    | FLAG-Rtt106p                                            | This study       |
| pGBKT7::Gal4-BD-Bcd1p    | ADH promoter, <i>TRP1</i> , Kan <sup>r</sup> , BD-Bcd1p | This study       |
| pACT2::GAL4-AD           | ADH promoter, <i>LEU2</i> , Amp <sup>r</sup>            | This study       |
| pACT2::GAL4-AD-Rtt106p   | AD-Rtt106p                                              | This study       |
| pACT2::GAL4-AD-Rtt106-Mp | AD-Rtt106-Mp                                            | This study       |
| pACT2::GAL4-AD-Spt16-Mp  | AD-Spt16-Mp                                             | This study       |
| pACT2::GAL4-AD-Pop3p-Mp  | AD-Pop3-Mp                                              | This study       |
| pFA6a-KanMX6-pGAL1-3HA   | Kan <sup>r</sup> - Amp <sup>r</sup>                     | This study       |
| <i>E. coli</i>           |                                                         |                  |
| pnCS::Bcd1p              | Bcd1p                                                   | This study       |
| pnCS ::Rtt106-Mp         | Rtt106-Mp                                               | This study       |
| pnCS ::Rtt106p           | Rtt106p                                                 | This study       |
| pnEA-3cH::HIS-Bcd1p      | HIS-Bcd1p                                               | This study       |
| pnEA-3cH::HIS-Rtt106-Mp  | HIS-Rtt106-Mp                                           | This study       |
| pnEA-3cH::HIS-Rtt106p    | HIS-Rtt106p                                             | This study       |

**Supplementary Table 5. Yeast strains used in this study**

| Strain                                             | Background | Genotype                                                                                                                                                                                                                                    | Reference  |
|----------------------------------------------------|------------|---------------------------------------------------------------------------------------------------------------------------------------------------------------------------------------------------------------------------------------------|------------|
| BY4741                                             | S288C      | <i>MATa</i> ; <i>his3Δ1</i> ; <i>leu2Δ0</i> ; <i>met15Δ0</i> ;<br><i>ura3Δ0</i>                                                                                                                                                             | 19         |
| <i>rtt106Δ</i>                                     | S288C      | <i>MATa</i> ; <i>his3Δ1</i> ; <i>leu2Δ0</i> ; <i>met15Δ0</i> ;<br><i>ura3Δ0</i> ; <i>ynl206cΔ::kanMX4</i>                                                                                                                                   | This study |
| <i>BCD1-TAP</i>                                    | S288C      | <i>MATa</i> ; <i>ade2</i> ; <i>arg4</i> ; <i>leu2-3,112</i> ;<br><i>trp1-289</i> ; <i>ura3-52</i> ; <i>HIS3::TAP-</i><br><i>YHR040w</i>                                                                                                     | 20         |
| <i>BCD1-TAP; rsa1Δ</i>                             | S288C      | <i>MATa</i> ; <i>his3Δ1</i> ; <i>leu2Δ0</i> ; <i>met15Δ0</i> ;<br><i>ura3Δ0</i> ; <i>HIS3::TAP-YHR040w</i> ;<br><i>YPL193w::LEU2</i>                                                                                                        | This study |
| <i>BCD1-TAP; pih1Δ</i>                             | S288C      | <i>MATa</i> ; <i>his3Δ1</i> ; <i>leu2Δ0</i> ; <i>met15Δ0</i> ;<br><i>ura3Δ0</i> ; <i>HIS3::TAP-YHR040w</i> ;<br><i>YHR034c::LEU2</i>                                                                                                        | This study |
| <i>BCD1-TAP; rtt106Δ</i>                           | S288C      | <i>MATa</i> ; <i>ade2</i> ; <i>arg4</i> ; <i>leu2-3,112</i> ;<br><i>trp1-289</i> ; <i>ura3-52</i> ; <i>HIS3::TAP-</i><br><i>YHR040w</i> ; <i>ynl206cΔ::kanMX4</i>                                                                           | This study |
| <i>GAL1::3HA-BCD1</i>                              | S288C      | <i>MATa</i> ; <i>his3Δ1</i> ; <i>leu2Δ0</i> ; <i>met15Δ0</i> ;<br><i>ura3Δ0</i> ; <i>pGAL1-3HA::kanMX6-</i><br><i>YHR040w</i>                                                                                                               | This study |
| <i>BCD1<sub>1-115</sub></i>                        | S288C      | <i>MATa</i> ; <i>his3Δ1</i> ; <i>leu2Δ0</i> ; <i>met15Δ0</i> ;<br><i>ura3Δ0</i> ; <i>kanMX6-YHR040w 1-115</i>                                                                                                                               | This study |
| <i>RTT106-TAP</i>                                  | S288C      | <i>MATa</i> ; <i>ade2</i> ; <i>arg4</i> ; <i>leu2-3,112</i> ;<br><i>trp1-289</i> ; <i>ura3-52</i> ; <i>HIS3::TAP-</i><br><i>YNL206C</i>                                                                                                     | This study |
| <i>RTT106-TAP;</i><br><i>GAL1::3HA-BCD1</i>        | S288C      | <i>MATa</i> ; <i>ade2</i> ; <i>arg4</i> ; <i>leu2-3,112</i> ;<br><i>trp1-289</i> ; <i>ura3-52</i> ; <i>HIS3::TAP-</i><br><i>YNL206C</i> ; <i>pGAL1-3HA::kanMX6-</i><br><i>YHR040w</i>                                                       | This study |
| <i>RTT106-TAP;</i><br><i>GAL1::3HA-BCD1; rsa1Δ</i> | S288C      | <i>MATa</i> ; <i>ade2</i> ; <i>arg4</i> ; <i>leu2-3,112</i> ;<br><i>trp1-289</i> ; <i>ura3-52</i> ; <i>HIS3::TAP-</i><br><i>YNL206C</i> ; <i>pGAL1-3HA::kanMX6-</i><br><i>YHR040w</i> ; <i>YPL193w::LEU2</i>                                | This study |
| Y187                                               |            | <i>MATα</i> , <i>gal4Δ</i> , <i>gal80Δ</i> , <i>ade2-101</i> ,<br><i>his3-200</i> , <i>leu2-3, 112</i> , <i>lys2-801</i> ,<br><i>trp1-901</i> , <i>ura3-52</i> ,<br><i>URA3::Gal1UASGAL1TATA-lacZ</i> ,<br><i>LYS2::GAL1UASHisTATA-HIS3</i> |            |
| Y190                                               |            | <i>MATα gal4Δ</i> , <i>gal80Δ</i> , <i>ade2-101</i> ,<br><i>his3-200</i> , <i>leu2-3, 112</i> , <i>lys2-801</i> ,<br><i>trp1-901</i> , <i>ura3-52</i> ,<br><i>URA3::Gal1UASGAL1TATA-lacZ</i> ,<br><i>LYS2::GAL1UASHisTATA-HIS3</i>          |            |

## Supplementary References



1. Jeronimo, C. *et al.* Systematic analysis of the protein interaction network for the human transcription machinery reveals the identity of the 7SK capping enzyme. *Molecular cell* **27**, 262-274, doi:10.1016/j.molcel.2007.06.027 (2007).
2. Boulon, S. *et al.* HSP90 and its R2TP/Prefoldin-like cochaperone are involved in the cytoplasmic assembly of RNA polymerase II. *Molecular cell* **39**, 912-924, doi:10.1016/j.molcel.2010.08.023 (2010).
3. Horejsi, Z. *et al.* Phosphorylation-dependent PIH1D1 interactions define substrate specificity of the R2TP cochaperone complex. *Cell reports* **7**, 19-26, doi:10.1016/j.celrep.2014.03.013 (2014).
4. Horejsi, Z. *et al.* CK2 phospho-dependent binding of R2TP complex to TEL2 is essential for mTOR and SMG1 stability. *Molecular cell* **39**, 839-850, doi:10.1016/j.molcel.2010.08.037 (2010).
5. Izumi, N., Yamashita, A., Hirano, H. & Ohno, S. Heat shock protein 90 regulates phosphatidylinositol 3-kinase-related protein kinase family proteins together with the RUVBL1/2 and Tel2-containing co-factor complex. *Cancer science* **103**, 50-57, doi:10.1111/j.1349-7006.2011.02112.x (2012).
6. Takai, H., Xie, Y., de Lange, T. & Pavletich, N. P. Tel2 structure and function in the Hsp90-dependent maturation of mTOR and ATR complexes. *Genes & development* **24**, 2019-2030, doi:10.1101/gad.1956410 (2010).
7. Bizarro, J. *et al.* NUFIP and the HSP90/R2TP chaperone bind the SMN complex and facilitate assembly of U4-specific proteins. *Nucleic acids research* **43**, 8973-8989, doi:10.1093/nar/gkv809 (2015).
8. Cloutier, P. *et al.* R2TP/Prefoldin-like component RUVBL1/RUVBL2 directly interacts with ZNHIT2 to regulate assembly of U5 small nuclear ribonucleoprotein. *Nature communications* **8**, 15615, doi:10.1038/ncomms15615 (2017).
9. Malinova, A. *et al.* Assembly of the U5 snRNP component PRPF8 is controlled by the HSP90/R2TP chaperones. *The Journal of cell biology* **216**, 1579-1596, doi:10.1083/jcb.201701165 (2017).
10. Cloutier, P. *et al.* High-resolution mapping of the protein interaction network for the human transcription machinery and affinity purification of RNA polymerase II-associated complexes. *Methods* **48**, 381-386, doi:10.1016/j.ymeth.2009.05.005 (2009).
11. Ruotolo, B. T., Benesch, J. L., Sandercock, A. M., Hyung, S. J. & Robinson, C. V. Ion mobility-mass spectrometry analysis of large protein complexes. *Nature protocols* **3**, 1139-1152, doi:10.1038/nprot.2008.78 (2008).
12. Sievers, F. *et al.* Fast, scalable generation of high-quality protein multiple sequence alignments using Clustal Omega. *Molecular systems biology* **7**, 539, doi:10.1038/msb.2011.75 (2011).
13. Su, D. *et al.* Structural basis for recognition of H3K56-acetylated histone H3-H4 by the chaperone Rtt106. *Nature* **483**, 104-107, doi:10.1038/nature10861 (2012).
14. Liu, Y. *et al.* Structural analysis of Rtt106p reveals a DNA binding role required for heterochromatin silencing. *The Journal of biological chemistry* **285**, 4251-4262, doi:10.1074/jbc.M109.055996 (2010).
15. Paul, A. *et al.* Bcd1p controls RNA loading of the core protein Nop58 during C/D box snoRNP biogenesis. *Rna*, doi:10.1261/rna.067967.118 (2019).
16. Teste, M. A., Duquenne, M., Francois, J. M. & Parrou, J. L. Validation of reference genes for quantitative expression analysis by real-time RT-PCR in *Saccharomyces cerevisiae*. *BMC Mol Biol* **10**, 99, doi:10.1186/1471-2199-10-99 (2009).
17. Zunder, R. M. & Rine, J. Direct interplay among histones, histone chaperones, and a chromatin boundary protein in the control of histone gene expression. *Molecular and cellular biology* **32**, 4337-4349, doi:10.1128/MCB.00871-12 (2012).

18. Mumberg, D., Muller, R. & Funk, M. Yeast vectors for the controlled expression of heterologous proteins in different genetic backgrounds. *Gene* **156**, 119-122, doi:10.1016/0378-1119(95)00037-7 (1995).
19. Brachmann, C. B. *et al.* Designer deletion strains derived from *Saccharomyces cerevisiae* S288C: a useful set of strains and plasmids for PCR-mediated gene disruption and other applications. *Yeast* **14**, 115-132, doi:10.1002/(SICI)1097-0061(19980130)14:2<115::AID-YEA204>3.0.CO;2-2 (1998).
20. Gavin, A. C. *et al.* Functional organization of the yeast proteome by systematic analysis of protein complexes. *Nature* **415**, 141-147, doi:10.1038/415141a (2002).
